# Supplementary material for: LM-19 lawsonite: a potential reference material for in situ oxygen isotope determination in lawsonite by ion microprobe
Source: Royal Society of Chemistry journal article supplement (doi:10.1039/d2ja00301e), 2022-12-01
Supplement: d2ja00301e1.pdf [file d2ja00301e1.pdf]

# LM-19 lawsonite: a potential reference material for *in situ* oxygen isotope determination in lawsonite by ion microprobe

A. E. Melnik, Q.-L. Li, J. Li, G.-Q. Tang, L.-J. Feng,  
J.-H. Li, Q. Mao, B. Putlitz and X.-H. Li

## Supplementary Figures

This file includes: Figures S1–S5

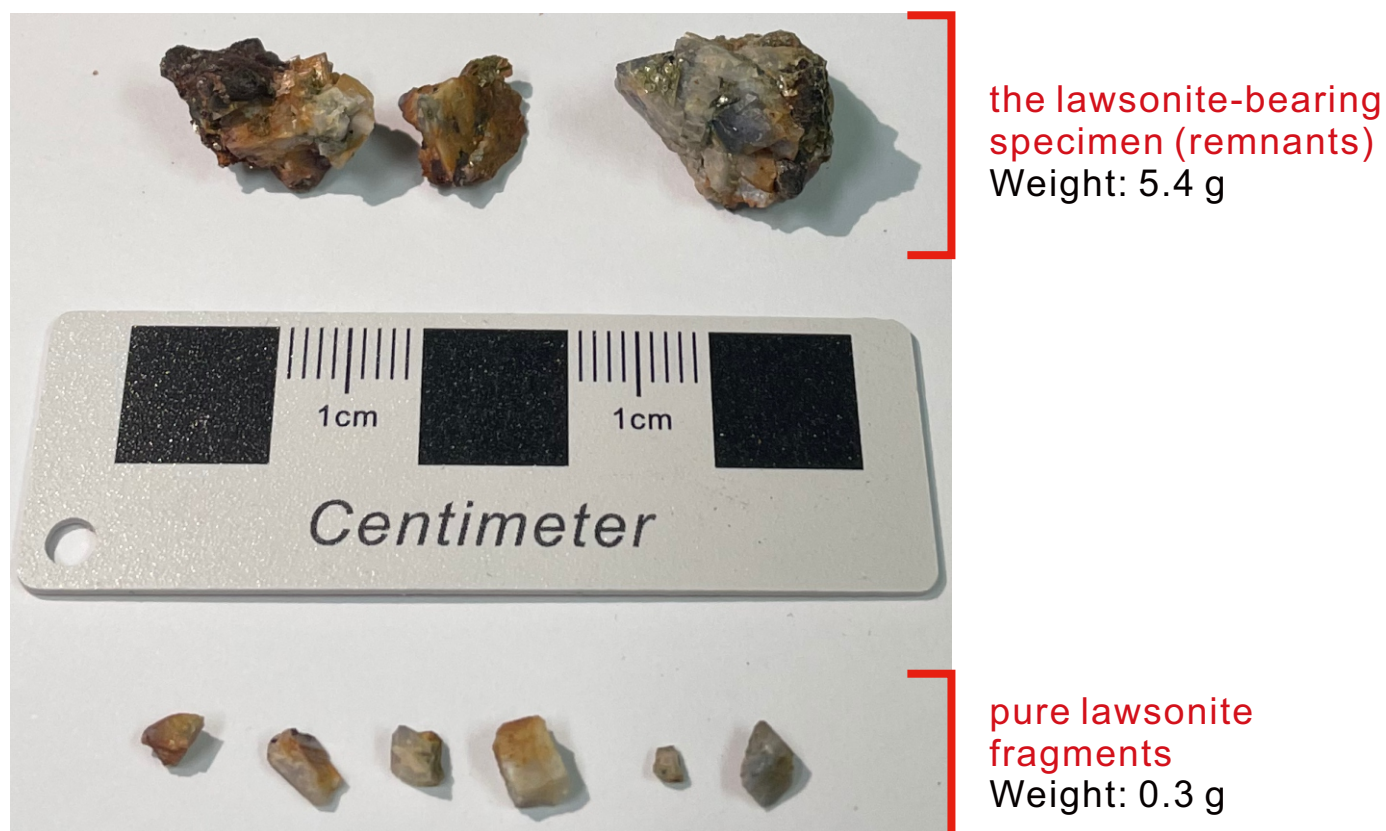

**Figure S1.** Remnants of the lawsonite-bearing rock specimen; pure LM-19 lawsonite fragments.

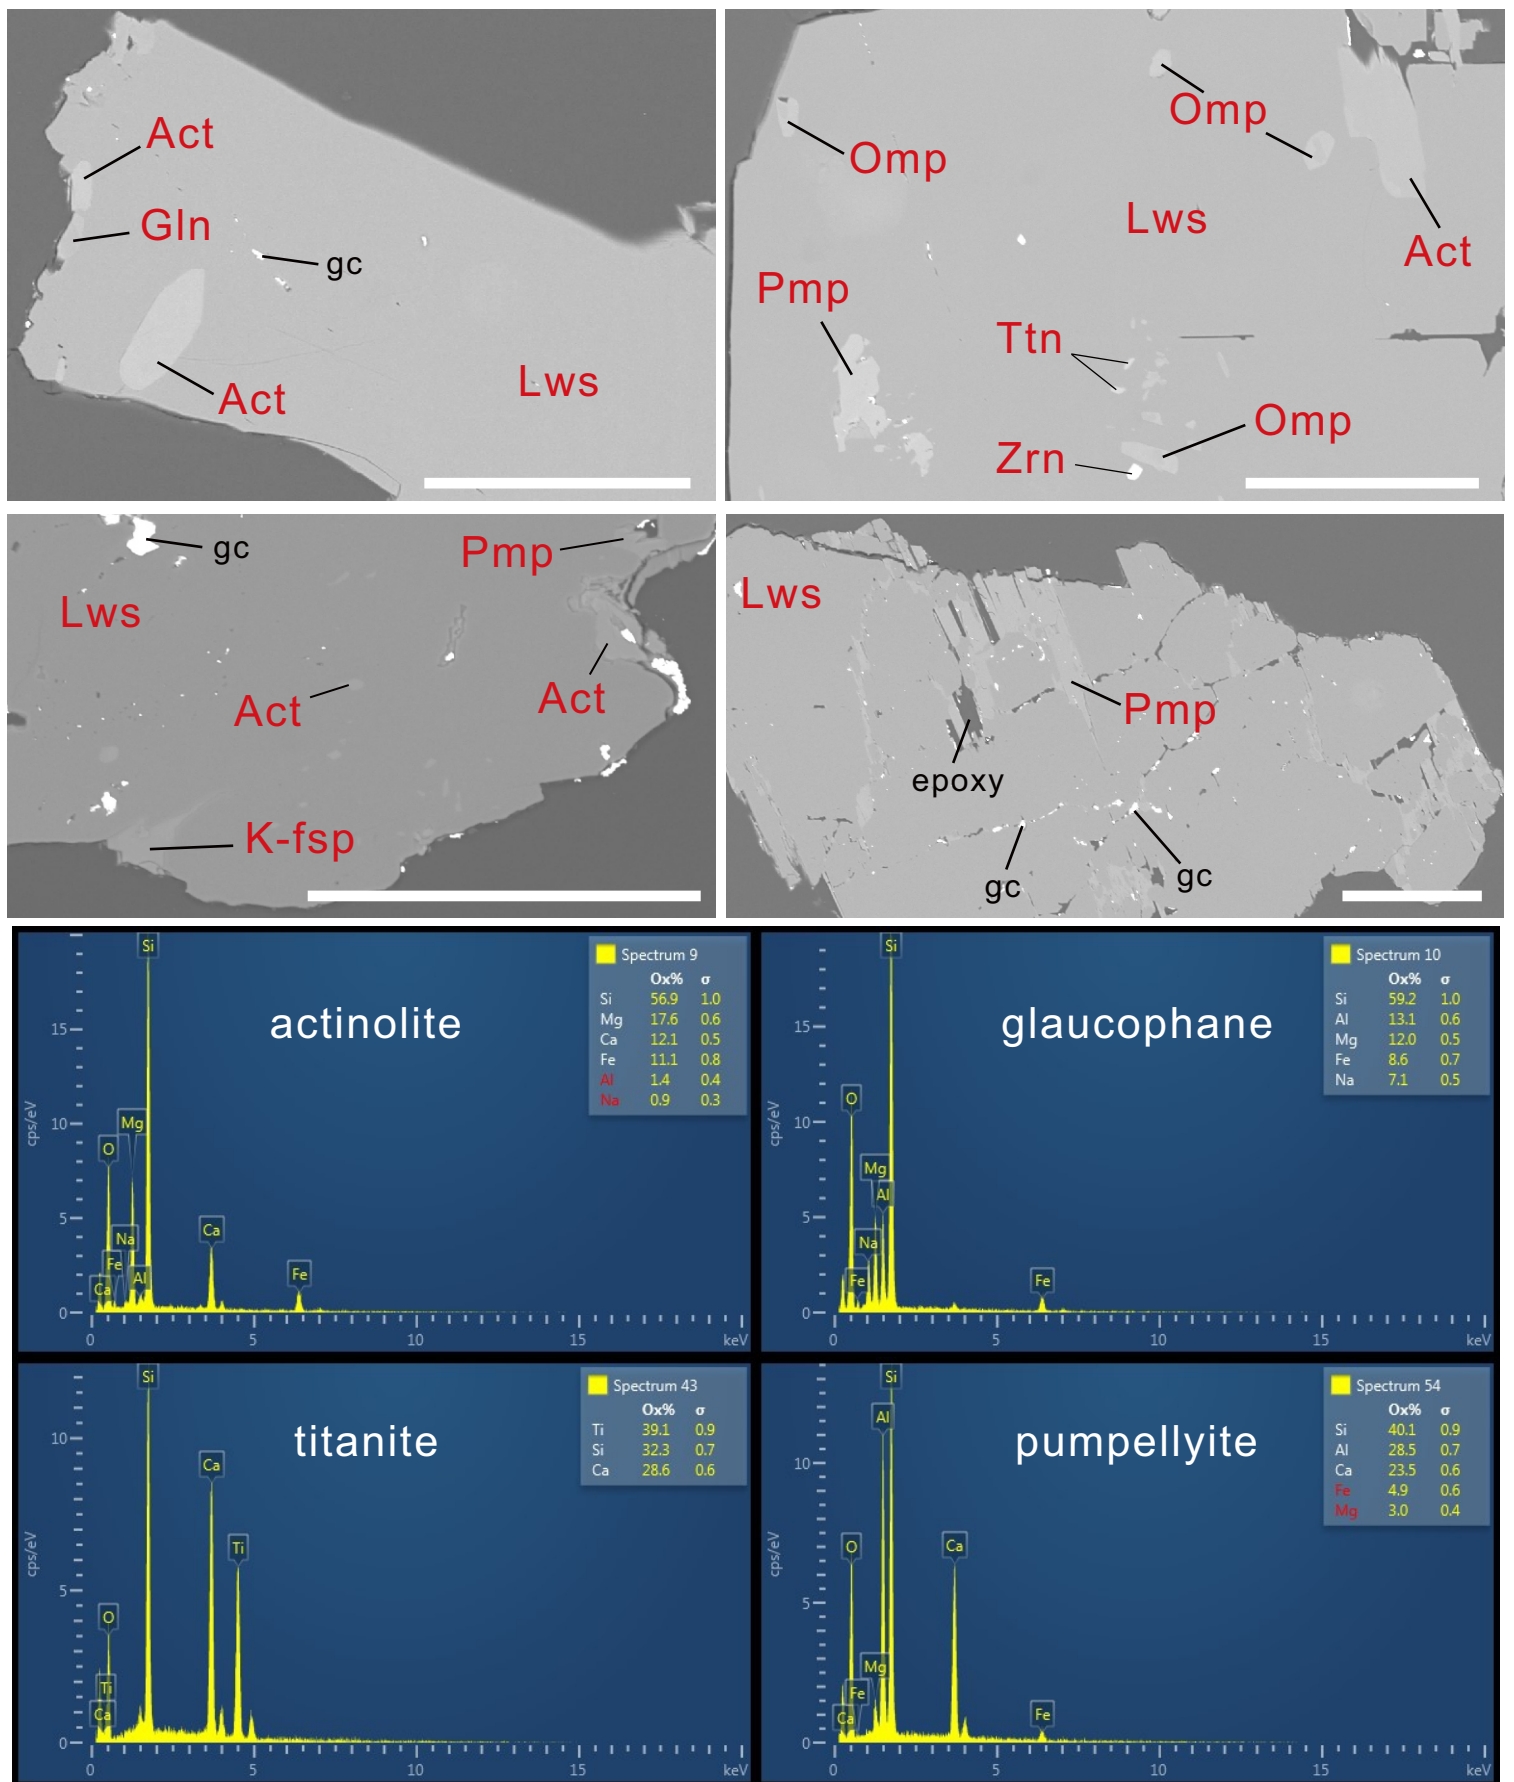

**Figure S2.** Representative BSE images and EDS spectra for inclusions, secondary minerals, and the host LM-19 lawsonite. Scale bars are 100  $\mu\text{m}$ . Act - actinolite; Gln - glaucophane; Omp - omphacite; Pmp - pumpellyite; K-fsp - K-feldspar; Ttn - titanite; Zrn - zircon; Lws - lawsonite; gc - remains of gold coating.

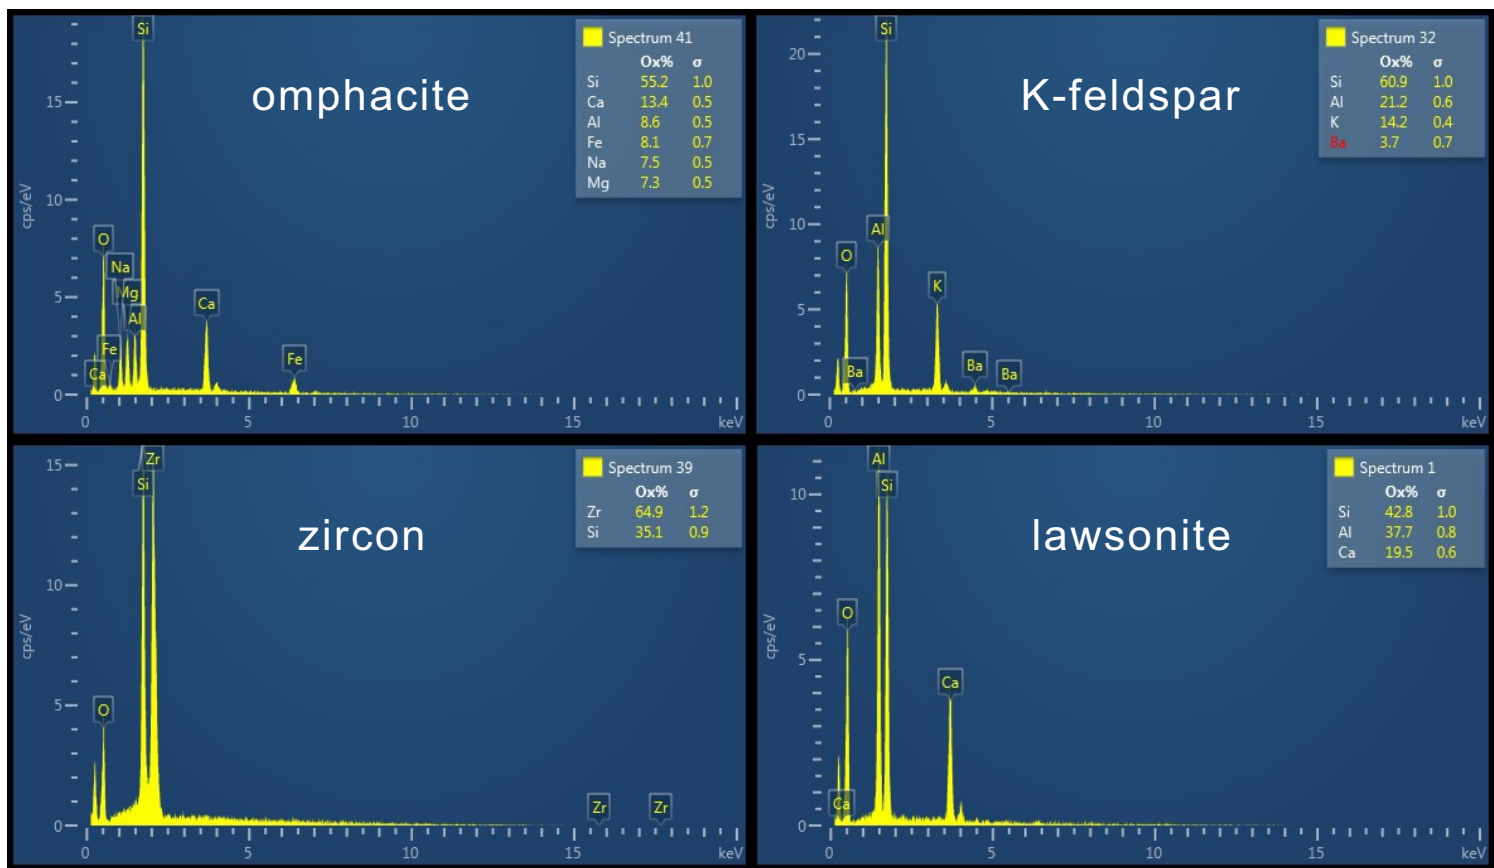

Figure S2. Continued.

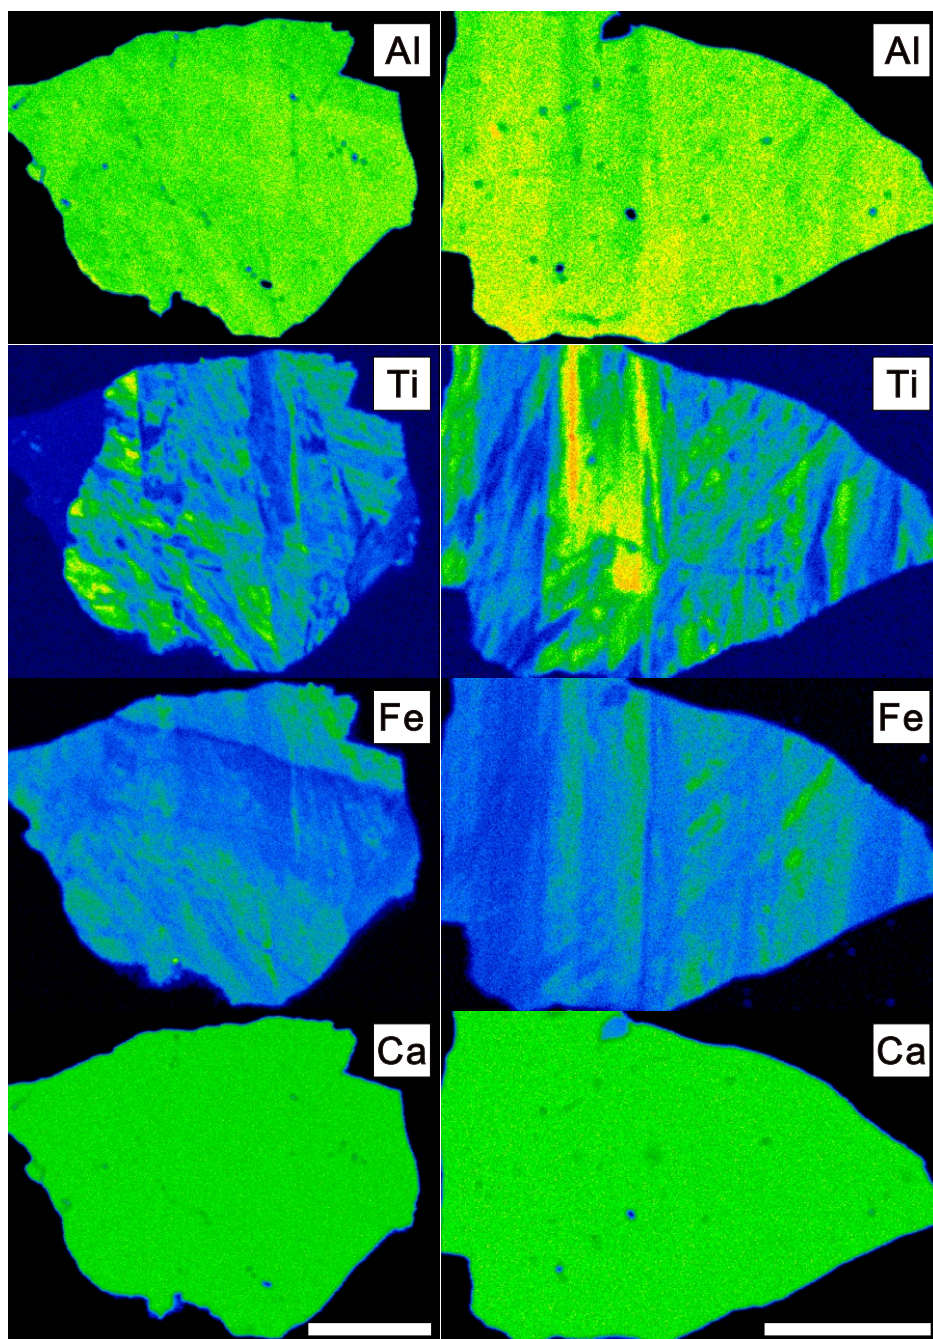

**Figure S3.** Al, Ti, Fe, and Ca qualitative X-ray maps for two additional LM-19 fragments that are not shown in Figure 4. Elemental contents increase from cold to warm colors. Scale bars are 200 μm.

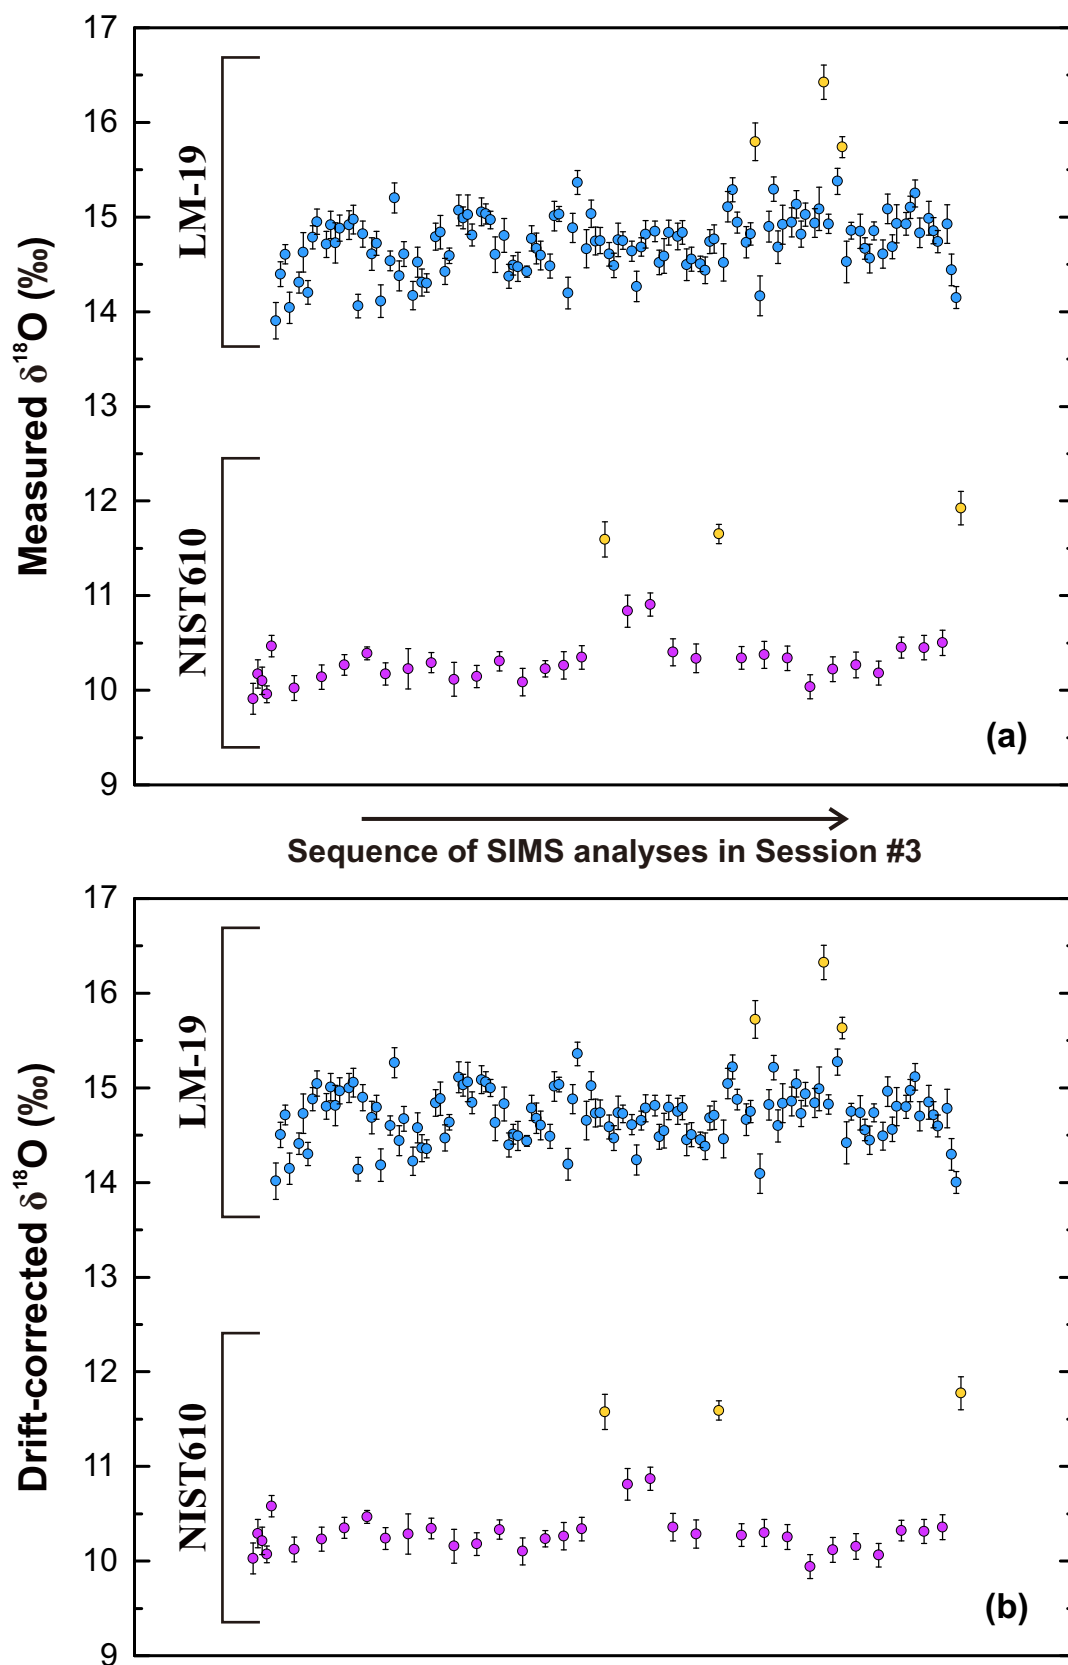

**Figure S4.** Plots showing temporal distribution of the SIMS oxygen isotopic analyses for LM-19 lawsonite and NIST610 in Session 3: (a) - measured  $\delta^{18}\text{O}$  values; (b) -  $\delta^{18}\text{O}$  values corrected for instrumental drift. Analyses with abnormally high  $\delta^{18}\text{O}$  values are marked with yellow color. Error bars are 2SE.

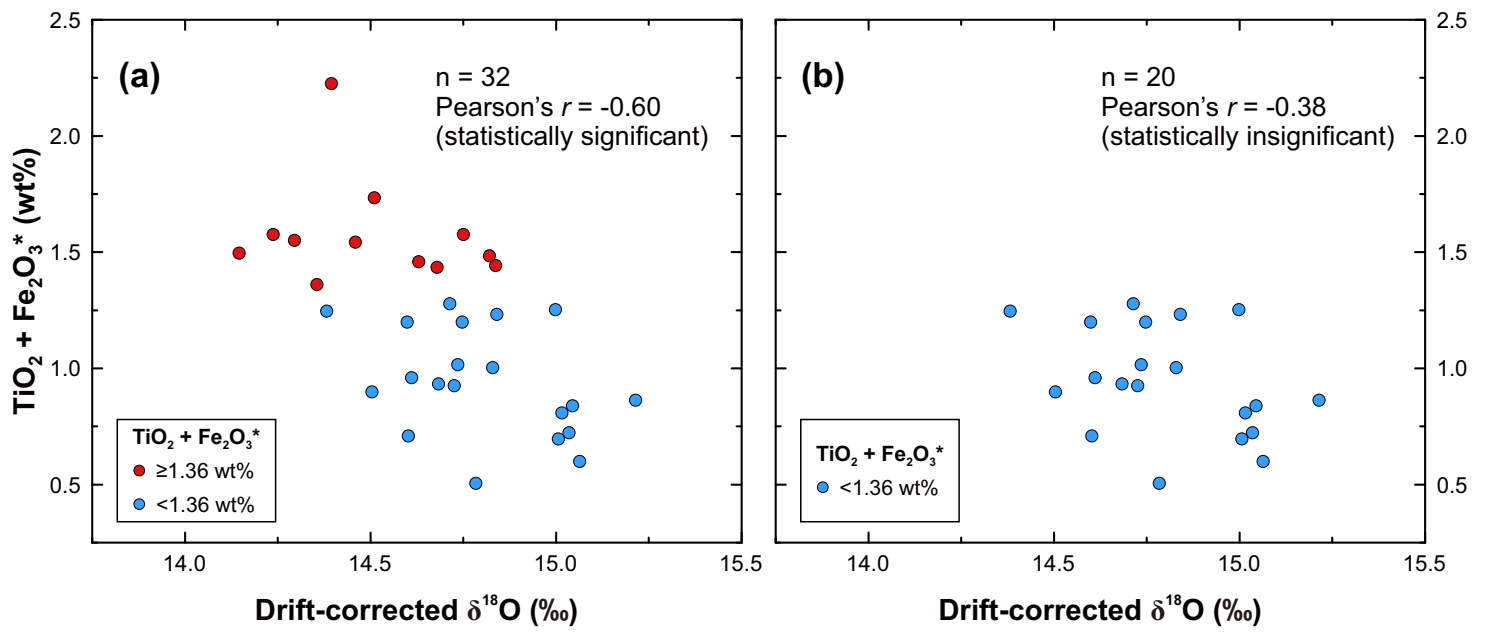

**Figure S5.** Correlation plots ( $\delta^{18}\text{O}$  vs.  $\text{TiO}_2 + \text{Fe}_2\text{O}_3^*$ ) for the LM-19 lawsonite (see the Main text and Table S4 for details).
