# Supplementary material for: LM-19 lawsonite: a potential reference material for in situ oxygen isotope determination in lawsonite by ion microprobe
Source: Royal Society of Chemistry journal article supplement (doi:10.1039/d2ja00301e), 2022-12-01
Supplement: d2ja00301e2.xlsx [file d2ja00301e2.xlsx]

## Sheet: Info
This file includes Supplementary Tables S1-S4 for:
A. E. Melnik, Q.-L. Li, , J. Li, G.-Q. Tang, L.-J. Feng, J.-H. Li, Q. Mao, B. Putlitz and X.-H. Li. LM–19 lawsonite: a potential reference material for in situ oxygen isotope determination in lawsonite by ion microprobe. Journal of Analytical Atomic Spectrometry, submitted in September 2022
Corresponding authors: Aleksey E. Melnik (aleksei@mail.iggcas.ac.cn) and Xian-Hua Li (lixh@gig.ac.cn)

## Sheet: Table S1 EPMA
Supplementary Table S1
Representative major and minor element compositions (wt%) of the LM-19 lawsonite
																	Cations calculated on 8 oxygen basis
Epoxy mount ID	EPMA analysis IDa	SiO2	TiO2	V2O3	Al2O3	Cr2O3	Fe2O3*	MnO	SrO	MgO	CaO	Na2O	K2O	Total	Fe2O3* + TiO2	Corresponding SIMS analysisb	Si	Ti	V	Al	Cr	Fe3+	Mn	Sr	Mg	Ca	Na	K	Ti+Al+Cr+Fe	Total cations
A5358	L1S1	38.1566	0.3421	0.0474	29.8933	0.111	0.881562				17.4735			86.9055	1.22366		2.04074	0.0137647	0.0020325	1.88425	0.00469365	0.0354799				1.0013			1.93819	4.98227
A5358**	L1S2	38.3056	0.5869	0.0372	29.7922	0.1401	0.896436				17.4946			87.253	1.48334		2.04121	0.023528	0.00158929	1.87101	0.00590247	0.0359466				0.998843			1.93639	4.97803
A5358	L1S3	38.6002	0.2196	0.0463	30.6462	0.0543	0.580419				17.5415			87.6885	0.800019		2.04129	0.0087366	0.00196305	1.91003	0.00227031	0.0230977				0.993913			1.94413	4.9813
A5358	L1S4	38.64	0.4346	0.0522	30.345	0.0982	0.666555				17.4195			87.6561	1.10116		2.0448	0.0173021	0.00221472	1.89255	0.0041086	0.0265437				0.987678			1.9405	4.97519
A5358	L1S5	38.2543	0.4908	0.0385	29.7263	0.0873	0.899433				17.374			86.8706	1.39023		2.04598	0.0197479	0.00165089	1.87374	0.00369152	0.0361995				0.995608			1.93338	4.97663
A5358	L1S6	37.7595	0.0538	0.0561	29.9594	0.0827	0.966699				17.5487	0.0285		86.4554	1.0205		2.03214	0.00217823	0.00242061	1.90023	0.00351885	0.0391498				1.0119	0.00297378		1.94508	4.99451
A5358	L1S7	38.3017	0.4435	0.039	30.0909	0.077	0.872016				17.5037			87.3278	1.31552		2.0381	0.017754	0.00166382	1.88708	0.00323942	0.0349176				0.99794			1.94299	4.98069
A5358	L1S8	38.6921	0.0563	0.0617	30.6042	0.0683	0.73593				17.4111			87.6296	0.79223		2.04703	0.00224081	0.00261711	1.90823	0.00285688	0.0292989				0.98695			1.94263	4.97923
A5358	L1S9	38.3763	0.0496	0.0652	30.5874	0.0735	0.783549				17.4736			87.4091	0.833149		2.0376	0.00198122	0.00277549	1.91402	0.00308541	0.0313065				0.994045			1.95039	4.98482
A5358	L1S10	38.311	0.5522	0.0681	30.0613	0.1005	0.79809				17.564			87.4552	1.35029		2.03624	0.0220799	0.00290194	1.88305	0.0042232	0.0319205				1.00022			1.94127	4.98063
A5358	L1S11	38.2975	0.4653	0.0612	30.1054	0.0601	0.780441	0.0272			17.5864			87.3835	1.24574		2.037	0.0186186	0.00260979	1.88717	0.00252734	0.0312372	0.00122537			1.00222			1.93956	4.98261
A5358	L1S12	38.4581	0.0712	0.0424	30.5158	0.0828	0.659784				17.6002			87.4303	0.730984		2.04128	0.00284309	0.00180433	1.90892	0.00347468	0.0263529				1.00092			1.94159	4.9856
A5358	L1S13	38.2908	0.2055	0.0661	30.4585	0.0851	0.518592				17.0081			86.6327	0.724092		2.04593	0.00826043	0.0028316	1.91801	0.00359497	0.0208513				0.973685			1.95072	4.97317
A5358	L1S14	38.7545	0.3447	0.0586	30.4259	0.0799	0.755577				17.22			87.6392	1.10028		2.04937	0.0137131	0.00248445	1.89622	0.00334052	0.0300669				0.97566			1.94334	4.97086
A5358	L1S15	38.2782	0.5669	0.0701	30.0206	0.1112	0.951603				17.4672			87.4658	1.5185		2.03491	0.0226723	0.00298777	1.88088	0.00467378	0.0380682				0.994912			1.9463	4.97911
A5358	L1S16	38.6396	0.3306	0.0395	30.2361	0.1101	0.920856				17.4254			87.7022	1.25146		2.04555	0.0131667	0.00167653	1.88648	0.00460824	0.0366845				0.988389			1.94094	4.97656
A5358	L1S17	37.9549	0.4077	0.0613	30.2383	0.0966	0.6216				17.6199			87.0003	1.0293		2.02767	0.0163857	0.00262558	1.90386	0.00408015	0.0249892				1.00856			1.94931	4.98817
A5358	L1S18	38.093	0.1987	0.0495	30.4681	0.1477	0.597957				17.5858			87.1408	0.796657		2.03029	0.00796719	0.00211521	1.91384	0.0062239	0.0239825				1.00425			1.95201	4.98866
A5358	L1S19	38.2223	0.0571	0.0711	30.566	0.0752	0.638472				17.5104			87.1406	0.695572		2.0355	0.00228763	0.00303571	1.91841	0.00316623	0.0255864				0.999121			1.94945	4.98711
A5358	L1S20	38.193	0.2649	0.0419	30.4154	0.0997	0.552003				17.5904			87.1573	0.816903		2.03435	0.010615	0.00178933	1.90934	0.00419862	0.0221256				1.00389			1.94628	4.98631
A5358	L1S21	37.818	0.0529	0.0475	30.4657	0.0803	0.586857				17.5581			86.6094	0.639757		2.02776	0.00213388	0.00204196	1.92521	0.00340411	0.023679				1.0087			1.95443	4.99293
A5358	L1S22	38.2178	0.0656	0.0412	30.6104	0.0861	0.704628				17.5952			87.3209	0.770228		2.03222	0.00262425	0.00175646	1.91833	0.00361975	0.0281954				1.00246			1.95276	4.9892
A5358	L1S23	37.9694	0.4944	0.0667	30.0098	0.1502	0.760572				17.4721			86.9232	1.25497		2.03083	0.0198936	0.00286023	1.89169	0.00635155	0.0306121				1.00127			1.94855	4.98352
A5358	L1S24	37.9199	0.7083	0.0653	29.7806	0.1256	0.983238				17.6219			87.2048	1.69154		2.02549	0.0284627	0.00279648	1.87476	0.00530424	0.0395216				1.00852			1.94804	4.98485
A5358	L1S25	38.2981	0.2751	0.0311	30.4915	0.0804	0.881895				17.6081			87.6662	1.157		2.03028	0.0109714	0.00132182	1.90504	0.0033698	0.0351809				1.00013			1.95456	4.98629
A5358	L1S26	38.4038	0.161	0.0471	30.446	0.117	0.885114				17.4737			87.5337	1.04611		2.03748	0.00642599	0.00200343	1.90369	0.00490766	0.0353371				0.993278			1.95036	4.98312
A5358	L2S27	38.0946	0.0438	0.0483	30.5896	0.0835	0.644466				17.5706			87.0749	0.688266		2.03114	0.00175689	0.0020647	1.92219	0.00351991	0.0258576				1.00376			1.95333	4.99029
A5358	L2S28	38.1784	0.073	0.0415	30.5065	0.0798	0.689088				17.4939			87.0622	0.762088		2.03533	0.00292776	0.00177378	1.91671	0.00336349	0.0276442				0.999242			1.95065	4.98699
A5358	L2S29	37.6448	0.2011	0.0793	30.0677	0.0954	0.896436				17.4219			86.4066	1.09754		2.02618	0.00814293	0.00342201	1.90731	0.00405968	0.0363082				1.0047			1.95582	4.99012
A5358	L2S30	38.7575	0.3321	0.055	30.328	0.0952	0.925851				17.329			87.8227	1.25795		2.04768	0.0131999	0.00232972	1.88841	0.0039766	0.0368094				0.980949			1.9424	4.97336
A5358	L2S31	38.6246	0.1133	0.0464	30.6552	0.0801	0.52614				17.6671			87.7128	0.63944		2.04246	0.00450728	0.00196717	1.91048	0.00334882	0.0209365				1.00097			1.93927	4.98467
A5358	L2S32	36.9326	0.0517	0.0572	29.8711	0.0731	0.803307				17.4069			85.1959	0.855007		2.01731	0.00212446	0.00250493	1.92293	0.00315683	0.0330185				1.01871			1.96123	4.99976
A5358	L2S33	37.935	0.3629	0.0634	30.0965	0.0611	0.765345				17.5754			86.8596	1.12825		2.03044	0.0146128	0.00272067	1.89852	0.0025856	0.0308262				1.00791			1.94654	4.98762
A5358	L2S34	38.6782	0.3294	0.0439	30.5896	0.103	0.725718				17.6752			88.145	1.05512		2.03756	0.0130546	0.00185414	1.89918	0.00428993	0.0287689				0.997642			1.94529	4.98234
A5358	L2S35	38.064	0.1858	0.0424	30.3603	0.0695	0.539238				17.6029			86.8641	0.725038		2.0344	0.00747071	0.00181686	1.91238	0.00293681	0.0216877				1.00803			1.94448	4.98872
A5358	L2S36	38.6588	0.197	0.0283	30.4519	0.0882	0.817626				17.6277			87.8695	1.01463		2.04279	0.00783135	0.00119894	1.89643	0.0036848	0.0325119				0.998017			1.94046	4.98247
	A5358 Min, wt%	36.9326	0.0438	0.0283	29.7263	0.0543	0.518592	0.0272			17.0081	0.0285		85.1959	0.63944
	A5358 Max, wt%	38.7575	0.7083	0.0793	30.6552	0.1502	0.983238	0.0272			17.6752	0.0285		88.145	1.69154
A5692	L1S35	37.7992	0.2649	0.0456	30.8859	0.1083	0.867687				17.3303			87.3019	1.13259		2.01155	0.0106053	0.00194557	1.93712	0.00455665	0.0347474				0.988145			1.98703	4.98866
A5692	L1S36	37.9885	0.1979	0.0292	31.0421	0.0279	0.70374				17.6195			87.6088	0.90164		2.01407	0.00789339	0.0012412	1.93964	0.00116949	0.0280767				1.00088			1.97678	4.99297
A5692	L1S37	37.6561	0.1216	0.0555	31.0041	0.0797	0.56832				17.6667			87.152	0.68992		2.00784	0.00487778	0.00237258	1.94832	0.00335986	0.0228033				1.00929			1.97936	4.99886
A5692	L1S38	37.941	0.6771	0.0973	30.6332	0.0494	0.872793				17.4921			87.7629	1.54989	Line 1@38	2.01069	0.026995	0.00413413	1.91327	0.00206982	0.0348064				0.993218			1.97714	4.98518
A5692	L1S34	37.5266	0.3222	0.0357	30.7822	0.0741	0.692751				17.4191			86.8527	1.01495	Line 1@34	2.00769	0.0129681	0.0015313	1.9409	0.00313433	0.0278898				0.998503			1.9849	4.99262
A5692	L1S5a	37.4382	0.4295	0.043	30.6286	0.06	0.806082				17.326			86.7314	1.23558		2.00654	0.0173177	0.00184772	1.93467	0.00254245	0.0325105				0.99494			1.98704	4.99036
A5692	L1S28	37.7659	0.5334	0.0497	30.6033	0.137	0.908868				17.4533	0.0317		87.4832	1.44227	Line 1@28	2.00863	0.0213426	0.0021193	1.9183	0.0057609	0.0363758				0.994591	0.00326886		1.98178	4.99039
A5692	L1S3	37.5988	0.4817	0.0384	30.5881	0.0849	0.796203				17.4524			87.0405	1.2779	Line 1@3	2.00873	0.0193606	0.0016448	1.92596	0.00358612	0.0320099				0.99901			1.98092	4.99031
A5692	L1S27	37.6033	0.2872	0.0395	30.6992	0.1015	0.911088				17.416			87.0578	1.19829	Line 1@27	2.00864	0.0115413	0.00169164	1.93264	0.0042866	0.0366226				0.996764			1.98509	4.99219
A5692	L1S1	36.9053	0.0188	0.0528	30.6876	0.0519	0.974913				17.2851			85.9764	0.993713		1.99711	0.000765362	0.00229078	1.95715	0.0022205	0.0397001				1.0022			1.99984	5.00144
A5692	L1S2	37.6834	0.0545	0.0444	30.9332	0.1563	0.843933				17.5207			87.2364	0.898433	Line 1@2	2.00848	0.00218529	0.0018973	1.94308	0.00658638	0.0338484				1.00054			1.9857	4.99663
A5692	L1S4	37.5273	0.4287	0.0475	30.4673	0.0969	1.06649				17.3811			87.0153	1.49519	Line 1@4	2.00736	0.0172515	0.00203707	1.9207	0.00409799	0.0429285				0.996142			1.98497	4.99051
A5692	L1S5	37.3999	0.3335	0.044	30.752	0.0718	0.792429				17.2722			86.6658	1.12593		2.0053	0.0134524	0.00189146	1.94325	0.0030437	0.0319728				0.992255			1.99172	4.99117
A5692	L1S26	37.2305	0.1433	0.0493	30.7085	0.1372	0.719613				17.2268			86.2152	0.862913	Line 1@26	2.00628	0.00580945	0.00212998	1.95029	0.00584544	0.0291813				0.994638			1.99113	4.99418
A5692	L1S8	37.3662	0.0433	0.0362	30.7817	0.0762	1.01099				17.4182			86.7328	1.05429		2.0042	0.00174721	0.0015567	1.94582	0.00323137	0.0408056				1.00099			1.9916	4.99835
A5692	L1S18	37.1385	0.7023	0.0526	30.0758	0.0632	1.42613				17.3128			86.7713	2.12843		1.99669	0.0284057	0.00226729	1.90569	0.00268642	0.0576976				0.99729			1.99448	4.99073
A5692	L1S13	37.697	0.4122	0.047	30.5712	0.097	1.02209				17.5659			87.4124	1.43429	Line 1@13	2.00777	0.0165162	0.00200696	1.91896	0.00408458	0.0409644				1.00241			1.98053	4.99271
A5692	L1S9	37.2932	0.2389	0.034	30.5896	0.0844	1.12188				17.3279			86.6899	1.36078	Line 1@9	2.00237	0.00964999	0.00146362	1.93569	0.00358284	0.0453287				0.996847			1.99426	4.99494
A5692	L1S10	37.6404	0.4365	0.053	30.7018	0.1292	0.944499				17.5589			87.4643	1.381		2.00336	0.0174777	0.0022616	1.92582	0.00543671	0.0378284				1.00131			1.98656	4.99349
A5692	L1S16	37.9166	0.1197	0.0273	31.2123	0.1146	0.601176				17.4501			87.4418	0.720876		2.01236	0.0047793	0.00116164	1.95231	0.00480872	0.0240098				0.992294			1.98591	4.99172
A5692	L1S21	37.0493	0.3015	0.0426	30.4661	0.1249	0.892107				17.5884			86.4649	1.19361		1.99643	0.0122224	0.00184043	1.93481	0.00532116	0.0361746				1.01547			1.98853	5.00227
A5692	L1S20	37.0526	0.0221	0.0509	30.8516	0.0812	0.903318				17.5247			86.4864	0.925418	Line 1@20	1.99432	0.000894878	0.00219649	1.95705	0.00345543	0.0365872				1.01063			1.99799	5.00514
A5692	L1S19	36.998	0.6719	0.0535	30.2433	0.1341	0.708957				17.2953			86.1051	1.38086		1.99954	0.0273181	0.00231814	1.92632	0.00572993	0.0288326				1.00149			1.9882	4.99154
A5692	L1S25	37.1619	0.1971	0.0373	30.7939	0.0974	0.736041				17.5939			86.6175	0.933141	Line 1@25	1.9966	0.00796665	0.00160671	1.94987	0.00413735	0.0297583				1.0128			1.99173	5.00274
A5692	L1S24	37.0172	0.4427	0.031	30.3822	0.0865	0.803085				17.4108			86.1735	1.24579	Line 1@24	1.99942	0.0179889	0.00134245	1.93405	0.00369391	0.0326418				1.00759			1.98837	4.99673
A5692	L2S19	37.2629	0.0485	0.0535	31.2383	0.2171	0.456321				17.5517			86.8283	0.504821	Line 2@19	1.99447	0.00195293	0.00229583	1.97054	0.00918713	0.0183795				1.00655			2.00006	5.00338
A5692	L2S20	37.2527	0.3971	0.0518	30.5923	0.0618	0.970584				17.4304			86.7567	1.36768		1.99892	0.01603	0.00222845	1.93463	0.00262177	0.0391907				1.0021			1.99247	4.99572
A5692	L2S17	37.076	0.4158	0.0586	30.2782	0.074	1.16028				17.4578			86.5207	1.57608	Line 2@17	1.99767	0.0168543	0.00253142	1.92269	0.00315233	0.0470443				1.00783			1.98974	4.99777
A5692	L2S18	37.2235	0.1647	0.0452	30.475	0.0709	1.14175				17.4391			86.5601	1.30645		2.00286	0.00666687	0.00194988	1.93252	0.00301612	0.0462291				1.00537			1.98844	4.99861
A5692	L2S16	37.4834		0.0423	31.0389	0.1164	0.959817				17.591			87.2318	0.959817	Line 2@16	1.99967		0.00180924	1.95152	0.00490956	0.0385319				1.00549			1.99497	5.00194
A5692	L2S12	37.4931	0.0723	0.033	31.1673	0.0849	0.650571				17.3473			86.8485	0.722871	Line 2@12	2.00425	0.00290759	0.00141432	1.96357	0.00358821	0.0261702				0.993571			1.99624	4.99547
A5692	L2S9	37.4156	0.0552	0.0609	30.8294	0.1053	1.01876				17.3778			86.863	1.07396		2.00375	0.00222395	0.00261483	1.94582	0.00445849	0.0410557				0.997131			1.99356	4.99705
A5692	L2S10	37.5696	0.0358	0.0589	31.1912	0.1231	0.424353				17.6626			87.0656	0.460153		2.00433	0.00143685	0.00251932	1.96116	0.0051923	0.0170362				1.00961			1.98482	5.00128
A5692	L2S5	37.4256	0.0608	0.0355	30.8419	0.1127	0.6882				17.5243			86.689	0.749		2.0068	0.00245264	0.00152616	1.94906	0.00477781	0.0277691				1.0068			1.98406	4.99918
A5692	L2S6	37.5756	0.048	0.0528	31.0716	0.1398	0.68931				17.5217			87.0988	0.73731		2.00492	0.00192676	0.00225871	1.9539	0.00589751	0.027677				1.00169			1.9894	4.99828
A5692	L2S11	37.0779	0.1618	0.0496	30.646	0.0822	0.645354				17.4375			86.1004	0.807154	Line 2@11	2.00225	0.00657321	0.00214744	1.95041	0.0035095	0.0262249				1.00892			1.98671	5.00003
A5692	L2S4	37.7654	0.0468	0.0579	31.0026	0.0767	0.79143				17.4139			87.1547	0.83823	Line 2@4	2.01254	0.00187626	0.0024738	1.94714	0.00323159	0.0317377				0.994292			1.98398	4.99329
A5692	L2S2	37.1708	0.2456	0.0455	30.5422	0.1662	0.927516				17.4811			86.5789	1.17312		1.99933	0.00993816	0.00196214	1.93611	0.00706778	0.0375419				1.00744			1.99066	4.99939
A5692	L2S1	37.7654	0.0597	0.0617	30.8006	0.1275	0.770229				17.2365			86.8216	0.829929		2.01909	0.00240122	0.00264473	1.94075	0.00538941	0.030988				0.987365			1.97952	4.98862
A5692	L2S22	37.6391	0.3759	0.0289	30.4122	0.1076	1.16705				17.4795			87.2103	1.54295	Line 2@22	2.0099	0.0151009	0.00123728	1.91395	0.00454272	0.0468962				1.00007			1.98049	4.99169
A5692	L2S24	37.7053	0.1349	0.0413	30.894	0.1178	0.665334				17.5942			87.1528	0.800234		2.01068	0.00541187	0.00176573	1.94161	0.00496655	0.0266988				1.00526			1.97869	4.99639
A5692	L2S28	37.9365	0.0365	0.0445	30.867		1.19569				17.4981			87.5783	1.23219	Line 2@28	2.0146	0.00145821	0.00189464	1.93185		0.0477817				0.995608			1.98109	4.99318
A5692	L2S31	37.945	0.1358	0.0387	31.1024	0.0548	0.821511				17.4722			87.5704	0.957311		2.0125	0.00541847	0.00164561	1.94412	0.0022979	0.0327874				0.992879			1.98463	4.99165
A5692	L2S32	38.0066		0.0441	31.0174	0.0467	1.03896				17.2643			87.4181	1.03896		2.0186		0.00187787	1.94153	0.001961	0.0415244				0.982444			1.98502	4.98795
A5692	L2S34	37.7951	0.0505	0.072	30.7937	0.0303	1.15973			0.022	17.4043			87.3276	1.21023		2.01284	0.0020233	0.00307427	1.93278	0.00127581	0.0464774			0.00174663	0.99311			1.98256	4.99333
A5692	L2S29	38.2996	0.0209	0.0498	31.1368	0.0283	0.977577				17.4608			87.9738	0.998477		2.02135	0.00082983	0.00210723	1.93673	0.00118087	0.038825				0.987368			1.97757	4.98839
A5692	L2S30	37.9615	0.1727	0.0428	31.2032	0.0229	0.558996				17.5304			87.4925	0.731696		2.01338	0.0068908	0.00181996	1.95042	0.000960257	0.0223102				0.996187			1.98059	4.99197
A5692	L3S9	37.4123	0.0155	0.0519	31.1319	0.1024	0.583194				17.6536			86.9508	0.598694	Line 3@9	2.00012	0.000623401	0.00222456	1.96153	0.00432823	0.0234621				1.01121			1.98994	5.00349
A5692	L3S1	37.7495		0.0339	31.2548	0.0686	0.69597				17.4832			87.286	0.69597	Line 3@1	2.00806		0.00144577	1.95943	0.00288509	0.0278592				0.996445			1.99018	4.99613
A5692	L3S2	37.5904	0.02	0.0445	30.7951	0.0957	1.09879				17.4634			87.1079	1.11879		2.00791	0.000803696	0.00190573	1.93863	0.00404155	0.0441665				0.999453			1.98765	4.99691
A5692	L3S3-1	37.4286	0.0482	0.0378	30.8999		0.940392				17.4715			86.8264	0.988592		2.00445	0.00194193	0.001623	1.95028		0.0378977				1.00251			1.99012	4.99871
A5692	L3S3-2	37.2737	0.2826	0.0595	30.7376	0.0658	0.709956				17.3897			86.5189	0.992556		2.00269	0.011423	0.00256309	1.94639	0.00279517	0.0287049				1.00109			1.98931	4.99566
A5692	L3S4	37.4922	0.0213	0.0437	30.8426		1.23088				17.3737			87.0044	1.25218	Line 3@4	2.00496	0.00085692	0.00187362	1.94386		0.0495328				0.995463			1.99425	4.99655
A5692	L3S6	37.8838	0.0787	0.0747	31.1586	0.0983	0.731712				17.4			87.4258	0.810412		2.01183	0.00314418	0.00318048	1.95013	0.00412725	0.0292408				0.990042			1.98664	4.99169
A5692	L3S7	38.05		0.0337	30.9721		1.05439				17.4994			87.6096	1.05439		2.01812		0.00143304	1.93602		0.0420829				0.994449			1.97811	4.99211
A5692	L4S6	37.4946	0.3772	0.0544	30.6445	0.0917	1.08147				17.5092			87.2531	1.45867	Line 4@6	2.00124	0.015146	0.0023279	1.92766	0.00386962	0.0434368				1.0013			1.99011	4.99497
A5692	L4S7	37.2994	0.1581	0.0289	30.7415	0.1176	0.843933				17.5786			86.768	1.00203	Line 4@7	2.00073	0.00637989	0.00124285	1.94338	0.00498727	0.0340648				1.01027			1.98882	5.00105
A5692	L4S8	37.3042	0.7704	0.0431	30.0317	0.1237	1.45399				17.4002			87.1273	2.22439	Line 4@8	1.99833	0.0310471	0.00185107	1.896	0.00523901	0.0586116				0.998691			1.99089	4.98977
A5692	L4S9	37.5036	0.4397	0.0464	30.4641	0.0392	1.29426				17.4746			87.2619	1.73396	Line 4@9	2.00273	0.0176645	0.00198656	1.91728	0.00165502	0.0520095				0.999823			1.98861	4.99314
A5692	L4S10	37.5898	0.3157	0.037	30.6082	0.1024	1.14996				17.3882			87.1913	1.46566		2.00668	0.0126788	0.0015836	1.92572	0.00432192	0.0461958				0.994556			1.98892	4.99173
A5692	L4S11	37.9246	0.2223	0.0515	30.7508	0.0559	0.929625				17.4378			87.3725	1.15193		2.01718	0.00889523	0.00219617	1.92764	0.00235074	0.0372085				0.993759			1.9761	4.98923
A5692	L4S22	37.5516	0.5547	0.0578	30.4152	0.1126	1.02131				17.6158			87.329	1.57601	Line 4@22	2.0036	0.0222657	0.00247255	1.91258	0.00474996	0.0410065				1.00705			1.98061	4.99373
A5692	L4S23	37.5587		0.0649	31.0123	0.0852	0.659673				17.5867			86.9675	0.659673		2.00703		0.0027805	1.9531	0.00359959	0.0265268				1.00692			1.98323	4.99996
A5692	L4S25	38.0149	0.633	0.0456	30.6548	0.1315	0.851481				17.3814			87.7127	1.48448	Line 4@25	2.01444	0.0252348	0.00193732	1.91446	0.0055093	0.0339538				0.986853			1.97916	4.98239
A5692	L4S30	37.3721	0.2534	0.0384	30.649	0.1616	0.94572				17.5885			87.0087	1.19912	Line 4@30	2.00041	0.0102041	0.00164793	1.93346	0.00683884	0.0380931				1.00871			1.9886	4.99937
A5692	L4S27	37.7888	0.4697	0.0469	30.7873	0.0859	0.679764				17.509			87.3674	1.14946		2.01009	0.0187961	0.00200014	1.93007	0.00361257	0.0272097				0.997887			1.97969	4.98967
A5692	L4S29	37.7049	0.5942	0.0389	30.2119	0.1269	1.15007				17.4828			87.3097	1.74427		2.01173	0.0238506	0.00166401	1.89975	0.00535307	0.0461752				0.999423			1.97513	4.98795
A5692	L5S3	38.0186	0.0299	0.0366	31.1721	0.0255	1.06704				17.3063			87.656	1.09694		2.01409	0.00119165	0.00155453	1.94624	0.00106805	0.042538				0.982324			1.99104	4.98901
A5692	L5S2	37.134	0.1094	0.0494	30.9055	0.1026	0.598401				17.5265			86.4258	0.707801	Line 5@2	1.99775	0.00442774	0.00213075	1.95954	0.00436402	0.0242256				1.01026			1.99255	5.00269
	A5692 Min, wt%	36.9053	<0.01	0.0273	30.0317	<0.02	0.424353			0.022	17.2268	0.0317		85.9764	0.460153
	A5692 Max, wt%	38.2996	0.7704	0.0973	31.2548	0.2171	1.45399			0.022	17.6667	0.0317		87.9738	2.22439
	All analyses Min, wt%	36.9053	<0.01	0.0273	29.7263	<0.02	0.424353	0.0272		0.022	17.0081	0.0285		85.1959	0.460153
	All analyses Max, wt%	38.7575	0.7704	0.0973	31.2548	0.2171	1.45399	0.0272		0.022	17.6752	0.0317		88.145	2.22439
Average detection limits for the oxides (calculated), wt%		0.0292008	0.0145938	0.0219058	0.0218359	0.021828	0.0266206	0.0174238	0.0528425	0.0180111	0.0247915	0.0228794	0.00889526
* All Fe is calculated as Fe3+.
** Dark blue color highlights analyses showing high Fe + Ti contents (i.e., Fe2O3* + TiO2 >= 1.36 wt%).
a: Here we provide 105 measurements within 77 LM-19 lawsonite fragments (15 and 62 within A5358 and A5692, respectively).
b: Because of the relatively fine zoning LM-19 lawsonite visible in Fig. 4, we assigned SIMS and EPMA individual analyses if they are located within 30 μm or less from each other.

## Sheet: Table S2 SIMS Oxygen
Supplementary Table S2
SIMS O isotope data for the LM-19 lawsonite and the NIST610 reference glass
																	Without three anomaluos analyses
Epoxy mount ID	Analysis ID	Date	Primary intensity, nA	Intensity O16	O18/O16	measured δ18O, ‰	drift-corrected δ18O*, ‰	δ18Oa, ‰	δ18Ob, ‰	± 2SE (internal error)	X position, μm	Y position, μm			± 1SD (all sessions)	n (all sessions)	± 1SD (all sessions)	n (all sessions)	Statistics for LM-19 (all sessions, n = 224)
Session #1: 30 analyses (2 spots per fragment) within fragments 1-15													± 1SD	n	0.270282	227	0.232935	224	Skewness	-0.261372	Kurtosis		0.582819
A5358	LM19-1@1	2019-12-17 17:50:00	1.443	1879525000	0.00206011	27.0146		9.21325	9.21325	0.26106	-6183	1075	0.150158	30					Std. error of Skewness	0.162582	Std. error of Kurtosis		0.323766
A5358	LM19-1@2	2019-12-17 17:53:00	1.43361	1912648000	0.00205948	26.7078		8.90642	8.90642	0.151228	-5921	1237							Z-score of Skewness	-1.60764	Z-score of Kurtosis		1.80012
A5358	LM19-1@3	2019-12-17 17:56:00	1.43611	1893641000	0.00205955	26.7418		8.94041	8.94041	0.177504	-5379	996
A5358	LM19-1@4	2019-12-17 17:59:00	1.43549	1889267000	0.00205971	26.8228		9.02149	9.02149	0.195889	-4494	959
A5358	LM19-1@5	2019-12-17 18:05:00	1.44292	1871213000	0.00205982	26.8772		9.07587	9.07587	0.150562	-3889	827
A5358	LM19-1@6	2019-12-17 18:08:00	1.4268	1851973000	0.00206029	27.1025		9.3011	9.3011	0.129953	-3683	1033
A5358	LM19-1@7	2019-12-17 18:11:00	1.43306	1832481000	0.00205995	26.9394		9.138	9.138	0.0976994	-2868	875
A5358	LM19-1@8	2019-12-17 18:14:00	1.43032	1868742000	0.00205948	26.7097		8.90836	8.90836	0.183011	-2574	1260
A5358	LM19-1@9	2019-12-17 18:21:00	1.43329	1889195000	0.00205907	26.5126		8.7112	8.7112	0.125084	-1481	1036
A5358	LM19-1@10	2019-12-17 18:24:00	1.43775	1870884000	0.00205986	26.8947		9.09334	9.09334	0.13837	-1322	792
A5358	LM19-1@11	2019-12-17 18:27:00	1.43634	1869703000	0.00205946	26.699		8.89768	8.89768	0.150295	-685	1140
A5358	LM19-1@12	2019-12-17 18:30:00	1.42367	1846021000	0.00205976	26.8457		9.04431	9.04431	0.149829	-84	1362
A5358	LM19-1@13	2019-12-17 18:36:00	1.43142	1843496000	0.00205975	26.8428		9.0414	9.0414	0.181662	329	1047
A5358	LM19-1@14	2019-12-17 18:39:00	1.43494	1866736000	0.00205977	26.8529		9.05159	9.05159	0.187512	802	1063
A5358	LM19-1@15	2019-12-17 18:42:00	1.43494	1877209000	0.00205965	26.7932		8.99187	8.99187	0.157584	1480	1107
A5358	LM19-1@16	2019-12-17 18:45:00	1.41843	1826661000	0.00205987	26.8966		9.09528	9.09528	0.159343	2152	925
A5358	LM19-1@17	2019-12-17 18:52:00	1.43533	1863226000	0.00205976	26.8447		9.04334	9.04334	0.135297	2923	1070
A5358	LM19-1@18	2019-12-17 18:55:00	1.4243	1812260000	0.00206	26.9607		9.15936	9.15936	0.19449	3228	864
A5358	LM19-1@19	2019-12-17 18:58:00	1.43142	1840071000	0.00205972	26.8267		9.02537	9.02537	0.121725	4195	1104
A5358	LM19-1@20	2019-12-17 19:01:00	1.4207	1838302000	0.00205997	26.9481		9.14674	9.14674	0.195771	4624	1118
A5358	LM19-1@21	2019-12-17 19:07:00	1.43768	1847912000	0.00205914	26.5436		8.74229	8.74229	0.196082	5317	1002
A5358	LM19-1@22	2019-12-17 19:10:00	1.42547	1830064000	0.00205921	26.5762		8.77482	8.77482	0.176782	5836	888
A5358	LM19-1@23	2019-12-17 19:14:00	1.43689	1898494000	0.00205935	26.6461		8.84475	8.84475	0.163239	-6295	2003
A5358	LM19-1@24	2019-12-17 19:17:00	1.4189	1834541000	0.00205933	26.6393		8.83795	8.83795	0.215178	-5573	1934
A5358	LM19-1@25	2019-12-17 19:23:00	1.4207	1875443000	0.00205935	26.6461		8.84475	8.84475	0.144007	-4678	2016
A5358	LM19-1@26	2019-12-17 19:26:00	1.42532	1835253000	0.00206	26.9631		9.16179	9.16179	0.150992	-4630	1640
A5358	LM19-1@27	2019-12-17 19:29:00	1.42203	1881696000	0.00205932	26.6311		8.8297	8.8297	0.134924	-3990	1966
A5358	LM19-1@28	2019-12-17 19:32:00	1.41749	1859718000	0.00205928	26.6116		8.81027	8.81027	0.128088	-3557	1990
A5358	LM19-1@29	2019-12-17 19:39:00	1.4329	1866897000	0.00205947	26.7029		8.90156	8.90156	0.141828	-2909	1723
A5358	LM19-1@30	2019-12-17 19:42:00	1.41867	1837985000	0.00205935	26.6471		8.84572	8.84572	0.123373	-2754	1888
Session #2: 77 analyses (3 to 9 spots per fragment) within fragments 1-15													± 1SD	n
A5358	LM19-2@1	2019-12-18 07:16:00	1.33418	1781717000	0.00205944	26.6879		8.86719	8.86719	0.107232	-6307	1191	0.174651	77
A5358	LM19-2@2	2019-12-18 07:19:00	1.32893	1778687000	0.00205949	26.7155		8.89486	8.89486	0.155801	-6248	1252
A5358	LM19-2@3	2019-12-18 07:25:00	1.32541	1772562000	0.00205947	26.7058		8.88515	8.88515	0.178664	-6113	1128
A5358	LM19-2@4	2019-12-18 07:28:00	1.32933	1736115000	0.00205971	26.8233		9.00265	9.00265	0.198395	-6197	901
A5358	LM19-2@5	2019-12-18 07:31:00	1.3154	1758820000	0.00205952	26.7301		8.90943	8.90943	0.14397	-5874	1133
A5358	LM19-2@6	2019-12-18 07:34:00	1.3064	1717108000	0.00205981	26.8719		9.0512	9.0512	0.143231	-5760	957
A5358	LM19-2@7	2019-12-18 07:41:00	1.33386	1760829000	0.00205969	26.8112		8.99051	8.99051	0.156056	-5185	947
A5358	LM19-2@8	2019-12-18 07:44:00	1.32315	1723726000	0.00206007	26.9966		9.17596	9.17596	0.234068	-5200	812
A5358	LM19-2@9	2019-12-18 07:47:00	1.30672	1733902000	0.00205997	26.9491		9.12839	9.12839	0.130804	-4632	1033
A5358	LM19-2@10	2019-12-18 07:50:00	1.3197	1717900000	0.00206018	27.0486		9.2279	9.2279	0.319426	-4015	801
A5358	LM19-2@11	2019-12-18 07:56:00	1.30617	1690601000	0.00205939	26.6646		8.84388	8.84388	0.204561	-3935	685
A5358	LM19-2@12	2019-12-18 07:59:00	1.32001	1717084000	0.00205997	26.9476		9.12693	9.12693	0.176844	-3757	675
A5358	LM19-2@13	2019-12-18 08:02:00	1.31712	1735086000	0.00205965	26.7903		8.96964	8.96964	0.1823	-3702	968
A5358	LM19-2@14	2019-12-18 08:05:00	1.31931	1744857000	0.00206007	26.9957		9.17499	9.17499	0.205945	-3860	946
A5358	LM19-2@15	2019-12-18 08:12:00	1.31548	1744040000	0.0020594	26.6689		8.84825	8.84825	0.132727	-3996	1225
A5358	LM19-2@16	2019-12-18 08:15:00	1.31665	1726364000	0.00205997	26.9491		9.12839	9.12839	0.219081	-3724	1156
A5358	LM19-2@17	2019-12-18 08:18:00	1.30445	1710425000	0.00205976	26.8447		9.02401	9.02401	0.211518	-3479	1157
A5358	LM19-2@18	2019-12-18 08:21:00	1.31344	1736920000	0.00205969	26.8131		8.99246	8.99246	0.209394	-3799	1344
A5358	LM19-2@19	2019-12-18 08:27:00	1.31493	1728305000	0.00205952	26.7296		8.90894	8.90894	0.151865	-2810	1072
A5358	LM19-2@20	2019-12-18 08:30:00	1.31736	1731753000	0.00205955	26.7452		8.92448	8.92448	0.192472	-2553	1215
A5358	LM19-2@21	2019-12-18 08:33:00	1.30288	1700484000	0.0020601	27.0093		9.18858	9.18858	0.156127	-2564	1089
A5358	LM19-2@22	2019-12-18 08:36:00	1.30781	1693054000	0.00205991	26.9204		9.09975	9.09975	0.190958	-2485	1002
A5358	LM19-2@23	2019-12-18 08:43:00	1.30719	1705928000	0.00205984	26.886		9.06528	9.06528	0.141696	-2632	1002
A5358	LM19-2@24	2019-12-18 08:46:00	1.31642	1718762000	0.00205984	26.884		9.06334	9.06334	0.158697	-2777	914
A5358	LM19-2@25	2019-12-18 08:49:00	1.31845	1723786000	0.00206008	27.0015		9.18082	9.18082	0.171465	-1759	924
A5358	LM19-2@26	2019-12-18 08:52:00	1.31868	1744534000	0.00205952	26.7306		8.90992	8.90992	0.127972	-1646	893
A5358	LM19-2@27	2019-12-18 08:58:00	1.3118	1726366000	0.0020598	26.8646		9.04392	9.04392	0.113359	-1362	1028
A5358	LM19-2@28	2019-12-18 09:01:00	1.30163	1684721000	0.00206014	27.0282		9.20751	9.20751	0.239475	-1207	981
A5358	LM19-2@29	2019-12-18 09:04:00	1.31931	1711211000	0.00206014	27.0316		9.21091	9.21091	0.130614	-763	952
A5358	LM19-2@30	2019-12-18 09:07:00	1.30844	1710361000	0.00205942	26.6806		8.8599	8.8599	0.129455	-528	1132
A5358	LM19-2@31	2019-12-18 09:13:00	1.30969	1733890000	0.00205957	26.7529		8.93225	8.93225	0.12394	-370	1256
A5358	LM19-2@32	2019-12-18 09:16:00	1.31031	1721497000	0.00205957	26.7515		8.93079	8.93079	0.194771	-234	1170
A5358	LM19-2@33	2019-12-18 09:19:00	1.30766	1710507000	0.00205962	26.7772		8.95653	8.95653	0.195648	-542	885
A5358	LM19-2@34	2019-12-18 09:22:00	1.3082	1715631000	0.0020596	26.7675		8.94682	8.94682	0.164908	-278	992
A5358	LM19-2@35	2019-12-18 09:29:00	1.30601	1738560000	0.00205947	26.7058		8.88515	8.88515	0.129494	282	1181
A5358	LM19-2@36	2019-12-18 09:32:00	1.31462	1705693000	0.00205937	26.6548		8.83417	8.83417	0.197631	326	994
A5358	LM19-2@37	2019-12-18 09:35:00	1.3057	1717858000	0.00205971	26.8233		9.00265	9.00265	0.210084	485	1102
A5358	LM19-2@38	2019-12-18 09:38:00	1.31204	1744911000	0.00205934	26.6408		8.82008	8.82008	0.123217	470	1266
A5358	LM19-2@39	2019-12-18 09:44:00	1.30859	1713721000	0.00205998	26.9525		9.13179	9.13179	0.144888	658	1012
A5358	LM19-2@40	2019-12-18 09:47:00	1.30586	1684661000	0.00205954	26.7369		8.91623	8.91623	0.180937	900	1000
A5358	LM19-2@41	2019-12-18 09:50:00	1.31055	1707926000	0.00205924	26.5932		8.7725	8.7725	0.165077	1673	950
A5358	LM19-2@42	2019-12-18 09:53:00	1.30476	1715380000	0.00205923	26.5859		8.76521	8.76521	0.165489	1992	994
A5358	LM19-2@43	2019-12-18 10:00:00	1.31908	1688279000	0.00205999	26.9564		9.13567	9.13567	0.166419	2054	643
A5358	LM19-2@44	2019-12-18 10:03:00	1.30601	1711939000	0.00205974	26.8384		9.0177	9.0177	0.166886	2195	976
A5358	LM19-2@45	2019-12-18 10:06:00	1.31125	1724182000	0.0020593	26.6213		8.80066	8.80066	0.124113	2731	985
A5358	LM19-2@46	2019-12-18 10:09:00	1.31196	1716421000	0.00205986	26.8957		9.07499	9.07499	0.177169	2784	1086
A5358	LM19-2@47	2019-12-18 10:15:00	1.30985	1709950000	0.00205952	26.7296		8.90894	8.90894	0.119237	2973	1190
A5358	LM19-2@48	2019-12-18 10:18:00	1.30805	1706155000	0.0020597	26.8156		8.99488	8.99488	0.172425	3219	1071
A5358	LM19-2@49	2019-12-18 10:21:00	1.30789	1692966000	0.00205901	26.479		8.65837	8.65837	0.188154	3298	864
A5358	LM19-2@50	2019-12-18 10:24:00	1.30367	1688228000	0.00205966	26.7986		8.97789	8.97789	0.153648	2992	952
A5358	LM19-2@51	2019-12-18 10:30:00	1.31157	1671863000	0.00206002	26.9719		9.1512	9.1512	0.189654	2872	755
A5358	LM19-2@52	2019-12-18 10:33:00	1.30249	1633905000	0.00206058	27.2447		9.42398	9.42398	0.179788	3081	694
A5358	LM19-2@53	2019-12-18 10:37:00	1.31078	1686946000	0.00205976	26.8452		9.0245	9.0245	0.185777	4086	1073
A5358	LM19-2@54	2019-12-18 10:40:00	1.31258	1669858000	0.00206044	27.1762		9.35555	9.35555	0.111968	4154	800
A5358	LM19-2@55	2019-12-18 10:46:00	1.29279	1724341000	0.00205964	26.7884		8.96769	8.96769	0.158602	4375	1216
A5358	LM19-2@56	2019-12-18 10:49:00	1.28896	1676287000	0.00205975	26.8413		9.02061	9.02061	0.17164	4765	1042
A5358	LM19-2@57	2019-12-18 10:52:00	1.31493	1709476000	0.00205843	26.2022		8.3815	8.3815	0.146702	5238	904
A5358	LM19-2@58	2019-12-18 10:55:00	1.3111	1730901000	0.00205913	26.5412		8.72053	8.72053	0.115132	5395	1084
A5358	LM19-2@59	2019-12-18 11:02:00	1.30961	1675178000	0.00205896	26.4587		8.63797	8.63797	0.164939	5447	781
A5358	LM19-2@60	2019-12-18 11:05:00	1.30367	1707264000	0.00205911	26.5281		8.70742	8.70742	0.166329	5539	917
A5358	LM19-2@61	2019-12-18 11:08:00	1.29881	1714088000	0.00205908	26.5135		8.69285	8.69285	0.190295	5727	980
A5358	LM19-2@62	2019-12-18 11:11:00	1.31008	1689116000	0.00205938	26.6621		8.84145	8.84145	0.204108	5790	764
A5358	LM19-2@63	2019-12-18 11:17:00	1.30421	1684237000	0.0020596	26.7656		8.94487	8.94487	0.144116	5910	828
A5358	LM19-2@64	2019-12-18 11:20:00	1.29318	1672597000	0.00205926	26.6029		8.78221	8.78221	0.188316	6004	908
A5358	LM19-2@65	2019-12-18 11:23:00	1.31063	1699576000	0.00205961	26.7709		8.95022	8.95022	0.233999	-6094	1738
A5358	LM19-2@66	2019-12-18 11:27:00	1.31477	1709875000	0.00205943	26.6859		8.86524	8.86524	0.129183	-6030	1770
A5358	LM19-2@67	2019-12-18 11:33:00	1.30898	1751368000	0.0020592	26.5728		8.7521	8.7521	0.141722	-5918	2123
A5358	LM19-2@68	2019-12-18 11:36:00	1.29326	1692927000	0.00205986	26.8942		9.07353	9.07353	0.169726	-5544	2004
A5358	LM19-2@69	2019-12-18 11:39:00	1.29435	1650180000	0.00206007	26.9952		9.1745	9.1745	0.193041	-4468	1704
A5358	LM19-2@70	2019-12-18 11:42:00	1.28849	1677927000	0.00206006	26.9913		9.17062	9.17062	0.151074	-4323	1936
A5358	LM19-2@71	2019-12-18 11:49:00	1.29827	1658740000	0.00205999	26.9554		9.1347	9.1347	0.177769	-4413	1738
A5358	LM19-2@72	2019-12-18 11:52:00	1.31008	1726517000	0.00205979	26.8617		9.04101	9.04101	0.158969	-3899	2023
A5358	LM19-2@73	2019-12-18 11:55:00	1.30406	1738865000	0.00205951	26.7233		8.90263	8.90263	0.129817	-3969	2006
A5358	LM19-2@74	2019-12-18 11:58:00	1.29138	1681517000	0.00206003	26.9772		9.15654	9.15654	0.157333	-3495	1894
A5358	LM19-2@75	2019-12-18 12:04:00	1.30179	1679781000	0.00205953	26.733		8.91234	8.91234	0.179967	-2863	1664
A5358	LM19-2@76	2019-12-18 12:07:00	1.30046	1693596000	0.00205979	26.8612		9.04052	9.04052	0.180881	-2843	1857
A5358	LM19-2@77	2019-12-18 12:10:00	1.29138	1648486000	0.00206025	27.086		9.26527	9.26527	0.178814	-2743	1726
Session #3: 120 analyses (1 to 3 spots per fragment) within fragments 16-114													± 1SD	n
A5692	Line 1@1	2020-05-20 20:59:00	2.54191	3115050000	0.00203328	13.9055	14.0153	8.25936	8.28906	0.192855	-255	-3167	0.356035	120	before drift correction
A5692	Line 1@2	2020-05-20 21:02:00	2.54035	3101935000	0.00203428	14.3962	14.5044	8.74837	8.77807	0.132995	-641	-3182	0.337287	120	after drift correction
A5692	Line 1@3	2020-05-20 21:05:00	2.54066	3112761000	0.0020347	14.607	14.7135	8.95754	8.98723	0.102668	-741	-2750	0.28051	117	after drift correction (excluding three analyses with abnormally high δ18O values)
A5692	Line 1@4	2020-05-20 21:08:00	2.54355	3146291000	0.00203355	14.0417	14.1465	8.39048	8.42018	0.165357	218	-2434
A5692	Line 1@5	2020-05-20 21:14:00	2.54426	3125003000	0.0020341	14.3092	14.4105	8.65456	8.68426	0.111707	532	-2432
A5692	Line 2@1	2020-05-20 21:17:00	2.54136	3096507000	0.00203475	14.6272	14.7269	8.97089	9.00058	0.208059	-726	-1215
A5692	Line 2@2	2020-05-20 21:20:00	2.54027	3125215000	0.00203388	14.2035	14.3014	8.54546	8.57515	0.12399	354	-1015
A5692	Line 2@3	2020-05-20 21:23:00	2.54152	3103933000	0.00203507	14.7854	14.8817	9.12572	9.15542	0.123402	324	-1462
A5692	Line 2@4	2020-05-20 21:26:00	2.53902	3087673000	0.0020354	14.9505	15.0451	9.28912	9.31881	0.134126	492	-1660
A5692	Line 2@5	2020-05-20 21:32:00	2.54113	3092899000	0.00203492	14.7122	14.8034	9.04741	9.0771	0.136891	1257	-886
A5692	Line 3@1	2020-05-20 21:35:00	2.54035	3077565000	0.00203534	14.9171	15.0066	9.25061	9.2803	0.144461	1532	409
A5692	Line 3@2	2020-05-20 21:38:00	2.54395	3084844000	0.00203495	14.726	14.8137	9.05777	9.08746	0.212129	365	417
A5692	Line 3@3	2020-05-20 21:41:00	2.54019	3066083000	0.00203527	14.8827	14.9688	9.21281	9.24251	0.138701	-235	-112
A5692	Line 3@4	2020-05-20 21:47:00	2.54238	3076398000	0.00203533	14.9161	14.9988	9.24282	9.27252	0.152538	-1227	211
A5692	Line 3@5	2020-05-20 21:50:00	2.54465	3100935000	0.00203545	14.9756	15.0566	9.30057	9.33027	0.151862	-2264	262
A5692	Line 4@1	2020-05-20 21:53:00	2.54395	3061933000	0.00203359	14.0609	14.1401	8.38416	8.41386	0.123781	3202	2824
A5692	Line 4@2	2020-05-20 21:56:00	2.54207	3043967000	0.00203514	14.8208	14.8984	9.1424	9.1721	0.137615	2921	2595
A5692	Line 4@3	2020-05-20 22:02:00	2.54418	3069670000	0.00203471	14.611	14.6852	8.92917	8.95886	0.171557	2982	2836
A5692	Line 4@4	2020-05-20 22:05:00	2.54606	3047099000	0.00203494	14.7215	14.794	9.03804	9.06774	0.126024	2606	2778
A5692	Line 4@5	2020-05-20 22:08:00	2.54035	3057424000	0.0020337	14.1135	14.1843	8.42828	8.45797	0.172068	2566	2543
A5692	Line 5@2	2020-05-20 22:17:00	2.54332	3054688000	0.00203456	14.5368	14.6024	8.84645	8.87615	0.102294	-4334	3586
A5692	Line 5@3	2020-05-20 22:20:00	2.54035	3013811000	0.00203592	15.2025	15.2665	9.51052	9.54022	0.159755	-3841	3618
A5692	Line 5@4	2020-05-20 22:23:00	2.54293	3085039000	0.00203424	14.3795	14.4417	8.68576	8.71545	0.159645	-3163	4010
A5692	Line 5@5	2020-05-20 22:26:00	2.54183	3085749000	0.00203471	14.6115	14.672	8.91606	8.94575	0.131202	-3168	3820
A5692	Line 1@6	2020-05-20 22:32:00	2.54809	3173605000	0.00203381	14.1685	14.2257	8.46975	8.49944	0.149192	713	-3051
A5692	Line 1@7	2020-05-20 22:35:00	2.54574	3134910000	0.00203454	14.5235	14.579	8.82298	8.85268	0.159168	1903	-3090
A5692	Line 1@8	2020-05-20 22:38:00	2.54786	3123490000	0.0020341	14.3101	14.3639	8.60794	8.63764	0.142141	2001	-2366
A5692	Line 1@9	2020-05-20 22:41:00	2.54574	3138687000	0.00203409	14.3038	14.3558	8.59985	8.62955	0.0963606	2866	-2618
A5692	Line 1@10	2020-05-20 22:47:00	2.54653	3127023000	0.00203508	14.7928	14.8415	9.0855	9.11519	0.141307	3529	-2434
A5692	Line 2@6	2020-05-20 22:50:00	2.54426	3117891000	0.00203518	14.839	14.886	9.12998	9.15968	0.175974	1415	-1527
A5692	Line 2@7	2020-05-20 22:53:00	2.54661	3105774000	0.00203434	14.4257	14.471	8.71497	8.74466	0.137308	2411	-1579
A5692	Line 2@8	2020-05-20 22:56:00	2.54747	3103549000	0.00203468	14.5923	14.6359	8.87989	8.90959	0.0806444	2342	-1379
A5692	Line 2@9	2020-05-20 23:03:00	2.54739	3109665000	0.00203565	15.0724	15.1125	9.35655	9.38625	0.163708	2768	-1186
A5692	Line 2@10	2020-05-20 23:06:00	2.54692	3099434000	0.00203549	14.9918	15.0303	9.27428	9.30398	0.115474	2569	-1099
A5692	Line 3@6	2020-05-20 23:09:00	2.54621	3083796000	0.00203556	15.0247	15.0615	9.3055	9.3352	0.208419	-3085	38
A5692	Line 3@7	2020-05-20 23:11:00	2.54872	3109869000	0.00203512	14.8095	14.8446	9.0886	9.1183	0.115375	-3912	-56
A5692	Line 3@8	2020-05-20 23:17:00	2.54684	3082202000	0.00203562	15.0542	15.0859	9.32988	9.35957	0.147954	2195	216
A5692	Line 3@9	2020-05-20 23:20:00	2.54793	3079496000	0.00203557	15.034	15.064	9.30803	9.33773	0.10662	3716	510
A5692	Line 3@10	2020-05-20 23:23:00	2.54864	3069598000	0.00203544	14.9697	14.998	9.24198	9.27167	0.0915541	4489	553
A5692	Line 4@6	2020-05-20 23:26:00	2.54465	3089344000	0.0020347	14.6036	14.6302	8.8742	8.90389	0.186662	2368	2540
A5692	Line 4@7	2020-05-20 23:32:00	2.54668	3067094000	0.00203511	14.8061	14.8292	9.07326	9.10296	0.178399	1315	2432
A5692	Line 4@8	2020-05-20 23:35:00	2.54966	3106503000	0.00203423	14.3736	14.395	8.63906	8.66876	0.126451	1349	2689
A5692	Line 4@9	2020-05-20 23:38:00	2.55059	3056480000	0.00203447	14.4906	14.5103	8.75435	8.78405	0.102488	1018	2662
A5692	Line 4@10	2020-05-20 23:41:00	2.55067	3085155000	0.00203443	14.4724	14.4904	8.73446	8.76416	0.153241	1085	2421
A5692	Line 1@11	2020-05-20 23:47:00	2.55279	3131479000	0.00203433	14.4247	14.4394	8.68338	8.71308	0.0584146	3082	-2927
A5692	Line 1@12	2020-05-20 23:50:00	2.55388	3129032000	0.00203504	14.7736	14.7866	9.03063	9.06033	0.13347	3221	-2890
A5692	Line 1@13	2020-05-20 23:53:00	2.5524	3120375000	0.00203483	14.668	14.6793	8.92328	8.95297	0.161487	3356	-2925
A5692	Line 1@14	2020-05-20 23:56:00	2.55396	3144987000	0.00203468	14.5938	14.6034	8.84737	8.87706	0.150779	4102	-2925
A5692	Line 1@15	2020-05-21 00:02:00	2.55169	3149476000	0.00203445	14.4827	14.4889	8.73289	8.76258	0.127259	4550	-2986
A5692	Line 2@11	2020-05-21 00:05:00	2.5502	3098119000	0.00203553	15.0114	15.0159	9.25994	9.28963	0.155628	3815	-1443
A5692	Line 2@12	2020-05-21 00:08:00	2.55146	3120045000	0.00203557	15.0326	15.0353	9.27936	9.30906	0.0787241	3775	-880
A5692	Line 2@15	2020-05-21 00:19:00	2.55372	3118248000	0.00203387	14.1961	14.1921	8.43608	8.46578	0.166857	5337	-1300
A5692	Line 4@11	2020-05-21 00:23:00	2.54645	3056775000	0.00203528	14.8876	14.8819	9.12593	9.15562	0.154057	687	2394
A5692	Line 4@12	2020-05-21 00:25:00	2.54833	3060369000	0.00203625	15.3666	15.3591	9.60316	9.63286	0.125563	539	2349
A5692	Line 4@13	2020-05-21 00:31:00	2.5502	3072711000	0.00203482	14.6655	14.6547	8.89872	8.92841	0.202713	221	2346
A5692	Line 4@14	2020-05-21 00:34:00	2.55036	3075701000	0.00203558	15.0355	15.023	9.26701	9.2967	0.146052	-95	2292
A5692	Line 4@15	2020-05-21 00:37:00	2.5484	3091815000	0.00203499	14.7476	14.7334	8.97739	9.00708	0.148109	-446	2327
A5692	Line 1@16	2020-05-21 00:40:00	2.5502	3146185000	0.002035	14.751	14.7351	8.97913	9.00882	0.138484	4320	-2494
A5692	Line 1@17	2020-05-21 00:46:00	2.55294	3136575000	0.00203471	14.6075	14.5882	8.83223	8.86192	0.125848	3902	-2362
A5692	Line 1@18	2020-05-21 00:50:00	2.55419	3157542000	0.00203447	14.4891	14.4681	8.71208	8.74177	0.13075	2797	-2995
A5692	Line 1@19	2020-05-21 00:53:00	2.55185	3135035000	0.00203501	14.7569	14.7342	8.97822	9.00792	0.176562	5042	-3047
A5692	Line 1@20	2020-05-21 00:55:00	2.55192	3123886000	0.002035	14.7505	14.7261	8.97014	8.99983	0.0921853	5154	-2513
A5692	Line 2@16	2020-05-21 01:01:00	2.55216	3125173000	0.00203477	14.639	14.6112	8.85518	8.88488	0.104893	5110	-1347
A5692	Line 2@17	2020-05-21 01:04:00	2.55005	3163312000	0.00203401	14.2674	14.2379	8.48187	8.51157	0.159108	5552	-772
A5692	Line 2@18	2020-05-21 01:07:00	2.55326	3114723000	0.00203486	14.6842	14.653	8.89699	8.92669	0.099144	5678	-688
A5692	Line 2@19	2020-05-21 01:10:00	2.55192	3115179000	0.00203513	14.8169	14.784	9.02797	9.05767	0.144199	5656	-1363
A5692	Line 2@20	2020-05-21 01:16:00	2.55333	3123236000	0.0020352	14.8493	14.813	9.057	9.0867	0.109617	6588	-542
A5692	Line 4@16	2020-05-21 01:20:00	2.552	3104190000	0.00203453	14.5205	14.4825	8.72653	8.75623	0.130349	-406	2560
A5692	Line 4@17	2020-05-21 01:22:00	2.55271	3092620000	0.00203467	14.5879	14.5482	8.79217	8.82186	0.183821	-683	2601
A5692	Line 4@18	2020-05-21 01:25:00	2.55067	3091050000	0.00203517	14.8351	14.7936	9.03765	9.06735	0.129915	-1377	2481
A5692	Line 4@19	2020-05-21 01:31:00	2.55185	3103666000	0.00203509	14.7962	14.7514	8.99544	9.02513	0.13929	-1296	2243
A5692	Line 4@20	2020-05-21 01:34:00	2.55427	3092866000	0.00203518	14.838	14.7915	9.0355	9.0652	0.126476	-1710	2460
A5692	Line 1@21	2020-05-21 01:37:00	2.5549	3133977000	0.00203448	14.4979	14.4497	8.69372	8.72342	0.167076	4690	-2310
A5692	Line 1@22	2020-05-21 01:40:00	2.5567	3159400000	0.0020346	14.5549	14.505	8.74904	8.77873	0.124947	5400	-2216
A5692	Line 1@23	2020-05-21 01:46:00	2.55271	3163073000	0.0020345	14.5053	14.452	8.696	8.72569	0.0808821	5848	-2852
A5692	Line 1@24	2020-05-21 01:49:00	2.55427	3142447000	0.00203436	14.437	14.382	8.62597	8.65567	0.139388	5993	-2892
A5692	Line 1@25	2020-05-21 01:52:00	2.55279	3128580000	0.00203498	14.7407	14.684	8.92801	8.9577	0.126618	6085	-2375
A5692	Line 2@21	2020-05-21 01:55:00	2.5549	3123761000	0.00203503	14.7668	14.7083	8.95235	8.98205	0.148365	6801	-1341
A5692	Line 2@22	2020-05-21 02:01:00	2.55302	3155889000	0.00203453	14.521	14.4592	8.70323	8.73292	0.198332	-1412	-1060
A5692	Line 2@23	2020-05-21 02:04:00	2.55365	3106794000	0.00203573	15.1087	15.0452	9.2892	9.3189	0.161159	-2123	-1109
A5692	Line 2@24	2020-05-21 02:07:00	2.55365	3112147000	0.00203609	15.287	15.2218	9.4658	9.4955	0.12665	-1656	-1596
A5692	Line 2@25	2020-05-21 02:10:00	2.5459	3149223000	0.00203539	14.9436	14.8767	9.12074	9.15043	0.11054	-2409	-1722
A5692	Line 4@21	2020-05-21 02:16:00	2.54606	3094406000	0.00203496	14.7338	14.6635	8.90753	8.93722	0.16672	-2134	2403
A5692	Line 4@22	2020-05-21 02:19:00	2.54481	3092044000	0.00203514	14.8223	14.7503	8.99428	9.02397	0.118916	-2176	2145
A5692	Line 4@23	2020-05-21 02:21:00	2.54567	3022549000	0.00203713	15.7972	15.7234	9.96746		0.199931	-2660	2078
A5692	Line 4@24	2020-05-21 02:24:00	2.54551	3123101000	0.00203381	14.1681	14.0926	8.33666	8.36635	0.208461	-2952	2376
A5692	Line 4@25	2020-05-21 02:31:00	2.54778	3117948000	0.0020353	14.8999	14.8211	9.06511	9.09481	0.161744	-2992	2123
A5692	Line 1@26	2020-05-21 02:34:00	2.5495	3130462000	0.00203611	15.2954	15.2148	9.45885	9.48855	0.129117	99	-3290
A5692	Line 1@27	2020-05-21 02:37:00	2.54778	3163452000	0.00203486	14.6812	14.599	8.84305	8.87274	0.170803	-1008	-3180
A5692	Line 1@28	2020-05-21 02:39:00	2.54621	3147395000	0.00203534	14.921	14.8371	9.08114	9.11083	0.205624	-1269	-2722
A5692	Line 1@29	2020-05-21 02:46:00	2.54747	3121278000	0.00203539	14.9436	14.8563	9.10034	9.13003	0.153633	-1539	-2816
A5692	Line 1@30	2020-05-21 02:49:00	2.55028	3120657000	0.00203578	15.1342	15.0452	9.28925	9.31894	0.143142	-1933	-2722
A5692	Line 2@26	2020-05-21 02:52:00	2.54668	3111888000	0.00203514	14.8188	14.7281	8.97214	9.00183	0.13836	-3243	-1838
A5692	Line 2@27	2020-05-21 02:55:00	2.54754	3116392000	0.00203556	15.0262	14.9338	9.17777	9.20747	0.12418	-3128	-1826
A5692	Line 2@28	2020-05-21 03:01:00	2.5477	3108869000	0.00203538	14.9368	14.8409	9.08496	9.11465	0.152356	-3450	-1400
A5692	Line 2@29	2020-05-21 03:04:00	2.5495	3125255000	0.00203568	15.0866	14.9891	9.2331	9.26279	0.229601	-4177	-1327
A5692	Line 2@30	2020-05-21 03:07:00	2.54833	3115753000	0.00203841	16.4248	16.3256	10.5696		0.180808	-4173	-1544
A5692	Line 4@26	2020-05-21 03:10:00	2.55083	3092553000	0.00203536	14.9269	14.826	9.07003	9.09973	0.101912	-3482	2319
A5692	Line 4@27	2020-05-21 03:16:00	2.55138	3097403000	0.00203628	15.3784	15.274	9.51805	9.54774	0.138212	-3961	2276
A5692	Line 4@28	2020-05-21 03:19:00	2.55138	3080163000	0.00203701	15.7392	15.6332	9.87724		0.113	-4150	2226
A5692	Line 4@29	2020-05-21 03:22:00	2.55271	3124220000	0.00203454	14.5259	14.4182	8.66224	8.69194	0.22161	-4007	2015
A5692	Line 4@30	2020-05-21 03:25:00	2.55302	3098870000	0.00203521	14.8572	14.7477	8.99176	9.02146	0.0875028	-4370	1852
A5692	Line 1@31	2020-05-21 03:31:00	2.55959	3172945000	0.0020352	14.8503	14.7375	8.98149	9.01118	0.180373	-2227	-2573
A5692	Line 1@32	2020-05-21 03:34:00	2.55482	3151749000	0.00203483	14.669	14.5544	8.79846	8.82815	0.11264	-2571	-3313
A5692	Line 1@33	2020-05-21 03:37:00	2.55584	3162876000	0.00203461	14.5623	14.4461	8.69011	8.71981	0.150992	-3249	-3253
A5692	Line 1@34	2020-05-21 03:40:00	2.55568	3143782000	0.00203521	14.8532	14.7353	8.97933	9.00903	0.0963199	-3511	-2822
A5692	Line 1@35	2020-05-21 03:46:00	2.55646	3166172000	0.00203471	14.611	14.4897	8.73367	8.76336	0.148684	-4059	-3432
A5692	Line 2@31	2020-05-21 03:49:00	2.55818	3126680000	0.00203568	15.0851	14.9621	9.20612	9.23582	0.156202	-3923	-1893
A5692	Line 2@32	2020-05-21 03:52:00	2.55576	3120647000	0.00203487	14.6867	14.5619	8.80595	8.83565	0.128839	-4776	-2042
A5692	Line 2@33	2020-05-21 03:54:00	2.55693	3130988000	0.00203536	14.9294	14.803	9.04699	9.07668	0.201594	-4750	-1880
A5692	Line 2@34	2020-05-21 04:01:00	2.5585	3131234000	0.00203536	14.9284	14.7986	9.04261	9.0723	0.121647	-4746	-1229
A5692	Line 4@31	2020-05-21 04:03:00	2.55584	3143051000	0.00203572	15.1038	14.9723	9.21629	9.24599	0.11881	-4948	1829
A5692	Line 4@32	2020-05-21 04:06:00	2.55709	3105462000	0.00203601	15.2507	15.1174	9.36146	9.39115	0.141596	-5061	2110
A5692	Line 4@33	2020-05-21 04:09:00	2.55834	3100590000	0.00203517	14.8336	14.6987	8.94268	8.97237	0.154022	-5482	1822
A5692	Line 4@34	2020-05-21 04:15:00	2.5556	3098843000	0.00203548	14.9859	14.8476	9.09159	9.12128	0.178529	-5636	2012
A5692	Line 4@35	2020-05-21 04:18:00	2.55724	3092969000	0.00203521	14.8547	14.7147	8.95871	8.9884	0.138309	-5782	1964
A5692	Line 1@36	2020-05-21 04:21:00	2.56092	3172631000	0.00203498	14.7397	14.598	8.84202	8.87172	0.117177	-4490	-2931
A5692	Line 1@37	2020-05-21 04:27:00	2.55991	3150635000	0.00203535	14.926	14.7808	9.02485	9.05455	0.204058	-4216	-2812
A5692	Line 1@38	2020-05-21 04:30:00	2.56163	3189303000	0.00203437	14.4419	14.2951	8.53909	8.56878	0.167444	-3986	-2711
A5692	Line 1@39	2020-05-21 04:33:00	2.56233	3218065000	0.00203377	14.1499	14.0013	8.24536	8.27506	0.115259	-3986	-2711
Session #3: Excluded mixed analyses that probed lawsonite and its inclusions
A5692	Line 5@1	2020-05-20 22:11:00	2.54285	3056000000	0.00203619	15.3356	15.4047			0.126801	-4607	3550
A5692	Line 2@13	2020-05-21 00:11:00	2.54919	3113249000	0.00203715	15.8099	15.811			0.186115	4660	-1465
A5692	Line 2@14	2020-05-21 00:17:00	2.5513	3169578000	0.00203504	14.7692	14.7669			0.166693	4511	-1409
a: The average value within every session is normalized to the IRMS value (δ18O = 8.98‰) obtained for the LM-19 lawsonite.
b: The average value within every session is normalized to the IRMS value (δ18O = 8.98‰) obtained for the LM-19 lawsonite; three anomaluosly high analyses are excluded for Session #3.
* In Session #3, instrumental drift correction was conducted using the NIST610 data (excluding three outliers).
Data for the NIST610 glass
Epoxy mount ID	Analysis ID	Date	Primary intensiy, nA	Intensity O16	O18/O16	measured δ18O, ‰	drift-corrected δ18O, ‰			± 2SE (internal error)	X position, μm	Y position, μm
Session #1													Mean	± 1SD	n
A5358	NIST610-1@21	2019-12-17 17:47:00	1.45316	2047210000	0.00205164	22.8947				0.125047	3074	-143	23.1063	0.189729	8
A5358	NIST610-1@22	2019-12-17 18:02:00	1.443	2042915000	0.00205167	22.9108				0.212448	2375	-41
A5358	NIST610-1@23	2019-12-17 18:18:00	1.42876	1972308000	0.00205214	23.1403				0.143646	2304	-139
A5358	NIST610-1@24	2019-12-17 18:33:00	1.43087	1965077000	0.00205251	23.3196				0.160083	2189	-166
A5358	NIST610-1@25	2019-12-17 18:49:00	1.42438	1980516000	0.00205233	23.231				0.127088	1322	-211
A5358	NIST610-1@26	2019-12-17 19:04:00	1.42625	1970680000	0.00205264	23.3839				0.184559	1208	-246
A5358	NIST610-1@27	2019-12-17 19:20:00	1.42336	1988537000	0.00205184	22.9946				0.18319	1124	-193
A5358	NIST610-1@28	2019-12-17 19:36:00	1.41999	1997001000	0.0020518	22.9751				0.151521	584	-169
Session #2													Mean	± 1SD	n
A5358	NIST610-2@32	2019-12-18 07:22:00	1.32729	1897941000	0.00205195	23.0453				0.203398	-845	-47	23.019	0.12992	19
A5358	NIST610-2@33	2019-12-18 07:38:00	1.3287	1900116000	0.00205179	22.9698				0.181847	-726	-45
A5358	NIST610-2@34	2019-12-18 07:53:00	1.30789	1853155000	0.00205234	23.2373				0.117116	-652	-108
A5358	NIST610-2@35	2019-12-18 08:09:00	1.33073	1898926000	0.00205145	22.8045				0.170712	74	-78
A5358	NIST610-2@36	2019-12-18 08:24:00	1.31415	1882769000	0.00205226	23.1983				0.1868	112	5
A5358	NIST610-2@37	2019-12-18 08:40:00	1.31055	1874760000	0.00205168	22.9152				0.181383	209	-23
A5358	NIST610-2@38	2019-12-18 08:55:00	1.31337	1861550000	0.00205224	23.1871				0.154808	316	-84
A5358	NIST610-2@39	2019-12-18 09:10:00	1.31696	1876541000	0.00205179	22.9678				0.183751	431	-104
A5358	NIST610-2@40	2019-12-18 09:26:00	1.30898	1866620000	0.00205181	22.9766				0.232286	1002	-166
A5358	NIST610-2@41	2019-12-18 09:41:00	1.31822	1878283000	0.00205149	22.824				0.184581	1067	-124
A5358	NIST610-2@42	2019-12-18 09:57:00	1.30812	1848912000	0.00205191	23.0287				0.139941	1137	-83
A5358	NIST610-2@43	2019-12-18 10:12:00	1.3082	1853390000	0.00205208	23.1125				0.170094	1194	-147
A5358	NIST610-2@44	2019-12-18 10:27:00	1.30977	1836117000	0.0020521	23.1213				0.184304	1972	-78
A5358	NIST610-2@45	2019-12-18 10:43:00	1.31149	1838583000	0.002052	23.0692				0.195075	2054	-124
A5358	NIST610-2@46	2019-12-18 10:59:00	1.31376	1862298000	0.00205195	23.0472				0.195577	2131	-85
A5358	NIST610-2@47	2019-12-18 11:14:00	1.30359	1848965000	0.00205196	23.0531				0.14523	2238	-74
A5358	NIST610-2@48	2019-12-18 11:30:00	1.31642	1866081000	0.00205145	22.804				0.187596	3126	-88
A5358	NIST610-2@49	2019-12-18 11:46:00	1.31196	1872427000	0.00205207	23.1062				0.140827	3015	-72
A5358	NIST610-2@50	2019-12-18 12:01:00	1.31595	1875406000	0.00205164	22.8932				0.114371	3094	2
Session #3													Mean	± 1SD	n
A5692	NIST610-3@1	2020-05-20 20:44:00	2.55099	3311452000	0.00202517	9.91034	10.0287			0.163279	-4049	968	10.4008	0.454208	36	before drift correction
A5692	NIST610-3@2	2020-05-20 20:47:00	2.55067	3317220000	0.0020257	10.1725	10.2892			0.148893	-1316	1360	10.2806	0.211987	33	before drift correction (excluding three analyses with abnormally high δ18O values)
A5692	NIST610-3@3	2020-05-20 20:50:00	2.54113	3305466000	0.00202556	10.0999	10.2149			0.145504	-1204	1482	10.3945	0.425734	36	after drift correction
A5692	NIST610-3@4	2020-05-20 20:53:00	2.53972	3324861000	0.00202527	9.95922	10.0725			0.0878848	-1320	1480	10.2806	0.192523	33	after drift correction (excluding three analyses with abnormally high δ18O values)
A5692	NIST610-3@5	2020-05-20 20:56:00	2.53675	3301058000	0.0020263	10.4667	10.5783			0.112751	-1448	1371
A5692	NIST610-3@6	2020-05-20 21:11:00	2.54152	3328100000	0.0020254	10.0214	10.1245			0.131159	-4080	1224
A5692	NIST610-3@7	2020-05-20 21:29:00	2.53777	3311564000	0.00202563	10.1389	10.2318			0.12785	-4063	1083
A5692	NIST610-3@8	2020-05-20 21:44:00	2.54003	3313128000	0.00202589	10.2668	10.3512			0.10964	-2756	1104
A5692	NIST610-3@9	2020-05-20 21:59:00	2.54582	3323354000	0.00202614	10.3907	10.4666			0.0664914	-2744	1259
A5692	NIST610-3@10	2020-05-20 22:14:00	2.54215	3310772000	0.0020257	10.172	10.2394			0.116527	-2614	1153
A5692	NIST610-3@11	2020-05-20 22:29:00	2.5441	3332351000	0.00202581	10.2268	10.2857			0.212906	-2529	1252
A5692	NIST610-3@12	2020-05-20 22:44:00	2.5423	3297726000	0.00202594	10.2925	10.3428			0.108409	-1410	1259
A5692	NIST610-3@13	2020-05-20 22:59:00	2.54348	3312091000	0.00202559	10.1157	10.1576			0.179053	-1302	1240
A5692	NIST610-3@14	2020-05-20 23:14:00	2.547	3317648000	0.00202565	10.1463	10.1797			0.118861	-1199	1232
A5692	NIST610-3@15	2020-05-20 23:29:00	2.54668	3316343000	0.00202598	10.3073	10.3321			0.102187	-1211	1351
A5692	NIST610-3@16	2020-05-20 23:44:00	2.55185	3360027000	0.00202553	10.0861	10.1025			0.143391	-1441	1469
A5692	NIST610-3@17	2020-05-20 23:59:00	2.55232	3353092000	0.00202582	10.2288	10.2367			0.0863088	-81	1559
A5692	NIST610-3@18	2020-05-21 00:14:00	2.55083	3351667000	0.00202589	10.2638	10.2632			0.145847	43	1588
A5692	NIST610-3@19	2020-05-21 00:28:00	2.5502	3347566000	0.00202606	10.3487	10.3396			0.124049	160	1584
A5692	NIST610-3@20	2020-05-21 00:43:00	2.54887	3318470000	0.00202858	11.5927	11.5751			0.184888	1155	1518
A5692	NIST610-3@21	2020-05-21 00:59:00	2.54887	3318375000	0.00202705	10.8367	10.8106			0.168539	1249	1535
A5692	NIST610-3@22	2020-05-21 01:13:00	2.55028	3320675000	0.00202719	10.9053	10.8707			0.122824	1344	1546
A5692	NIST610-3@23	2020-05-21 01:28:00	2.55271	3347673000	0.00202617	10.402	10.3589			0.143926	1615	1656
A5692	NIST610-3@24	2020-05-21 01:43:00	2.5538	3340895000	0.00202604	10.3374	10.2858			0.150758	1511	1637
A5692	NIST610-3@25	2020-05-21 01:58:00	2.55498	3344956000	0.0020287	11.6519	11.5918			0.102018	1406	1626
A5692	NIST610-3@26	2020-05-21 02:13:00	2.54637	3323116000	0.00202604	10.3413	10.2727			0.119909	2566	1722
A5692	NIST610-3@27	2020-05-21 02:27:00	2.54582	3328421000	0.00202611	10.3749	10.2978			0.141218	2628	1632
A5692	NIST610-3@28	2020-05-21 02:43:00	2.54551	3322285000	0.00202604	10.3379	10.2522			0.131015	2700	1597
A5692	NIST610-3@29	2020-05-21 02:58:00	2.54762	3329253000	0.00202543	10.0367	9.94262			0.12749	2790	1664
A5692	NIST610-3@30	2020-05-21 03:13:00	2.5513	3354772000	0.0020258	10.2219	10.1192			0.132546	2875	1736
A5692	NIST610-3@31	2020-05-21 03:28:00	2.55654	3352656000	0.00202589	10.2663	10.1552			0.136121	2770	1748
A5692	NIST610-3@32	2020-05-21 03:43:00	2.55427	3341518000	0.00202572	10.1819	10.0623			0.125027	3652	1656
A5692	NIST610-3@33	2020-05-21 03:58:00	2.55357	3327329000	0.00202627	10.4514	10.3233			0.109393	3763	1675
A5692	NIST610-3@34	2020-05-21 04:12:00	2.55568	3329827000	0.00202626	10.4499	10.3133			0.128248	3864	1708
A5692	NIST610-3@35	2020-05-21 04:24:00	2.56155	3340427000	0.00202637	10.5017	10.3583			0.133196	3964	1802
A5692	NIST610-3@36	2020-05-21 04:37:00	2.56217	3356873000	0.00202925	11.9239	11.7737			0.175407	4722	1838

## Sheet: Table S3 IRMS Oxygen
Supplementary Table S3
IRMS O isotope data for the LM-19 lawsonite
Laboratory	Sample type	Session	Weight, mg	Analysis ID	measured δ18O, ‰	final δ18O, ‰				Mean (all analyses)	± 1SD	n	UNIL mean	± 1SD	n	IGGCAS mean	± 1SD	n
							Mean	± 1SD	n	8.97533	0.103302	11	8.99295	0.105256	7	8.9445	0.106872	4
UNIL	translucent/ subtransparent	1	1.97	14_4/LM-19	8.747	8.94575	9.03191	0.053233	6
UNIL	translucent/ subtransparent	2	1.87	28_6/LM-19	8.799	9.01425
UNIL	translucent/ subtransparent	2	1.78	28_7/LM-19	8.881	9.09625
UNIL	translucent/ subtransparent	3	1.93	36_6/LM-19	8.863	9.0662
IGGCAS	translucent/ subtransparent		~1.5	1/LM-19		9.011
IGGCAS	translucent/ subtransparent		~1.5	2/LM-19		9.058
							Mean	± 1SD	n
UNIL	transparent	1	1.85	14_6/LM-19t	8.604	8.80275	8.90744	0.11213	5
UNIL	transparent	2	1.89	28_2/LM-19t	8.724	8.93925
UNIL	transparent	3	1.17	36_2/LM-19t	8.883	9.0862
IGGCAS	transparent		~1.5	3/LM-19t		8.835
IGGCAS	transparent		~1.5	4/LM-19t		8.874
Excludes analyses
Laboratory	Sample type	Session	Weight, mg	Analysis ID	measured δ18O, ‰	final δ18O, ‰	Mean	± 1SD	n	Comment
UNIL	translucent/ subtransparent	1	1.73	14_2/LM-19	8.257	8.45575	8.69143	0.202817	5	Sputter during analysis
UNIL	transparent	1	1.83	14_8/LM-19t	8.3	8.49875				Sputter during analysis
UNIL	transparent	2	1.87	28_4/LM-19t	8.543	8.75825				Sputter during analysis
UNIL	transparent	3	0.97	36_4/LM-19t	8.637	8.8402				Sputter during analysis and incomplete sample reaction
UNIL	translucent/ subtransparent	3	1.79	36_8/LM-19	8.701	8.9042				Sputter during analysis and incomplete sample reaction
Data for the reference quartz (NBS-28) used during analysis at UNIL
Laboratory	Date	Session	Mean measured δ18O, ‰	± 1SD	n	Deviation to the accepted value, ‰
UNIL	2020/09/25	1	9.44	0.107	4	0.19875
UNIL	2020/11/19	2	9.42	0.015	4	0.21525
UNIL	2020/12/08	3	9.44	0.077	5	0.2032

## Sheet: Table S4 Correlations
Supplementary Table S4
Analysis of linear correlation between chemical and oxygen isotope compositions of the LM-19 lawsonite
Pearson correlation coefficientsa (r) for closely located EPMA and SIMS analysesb (n = 32 for EPMA&SIMS pairs)									Pearson correlation coefficientsa (r) at gradually increasing Fe2O3* + TiO2				Correlation between δ18O and Fe2O3* + TiO2						Source data for the correlation analysis
Fe2O3* and δ18O	Al2O3 and δ18O	V2O3 and δ18O	Cr2O3 and δ18O	TiO2 and δ18O	(Fe2O3* + TiO2) and δ18O	(Fe2O3* + TiO2) and Al2O3	CaO and δ18O	SiO2 and δ18O	Range of Fe2O3* + TiO2, wt%	#c	n	(Fe2O3* + TiO2) and δ18O	#c	n	Fe2O3* + TiO2, wt%	Drift-corrected δ18O, ‰	Mean δ18O, ‰	1SD, ‰	#c	Epoxy mount ID	EPMA analysis ID	Corresponding SIMS analysisb	Corresponding drift-corrected δ18O, ‰	Fe2O3*, wt%	Al2O3, wt%	V2O3, wt%	Cr2O3, wt%	TiO2, wt%	Fe2O3* + TiO2, wt%	CaO, wt%	SiO2, wt%
-0.485439	0.601316	-0.137859	0.186182	-0.537128	-0.600142	-0.877668	-0.0321996	0.0916071	0.50-1.01	1 to 14	14	-0.319202	all analyses	32	0.50-2.22	14.15-15.21	14.6956	0.263813	1	A5692	L2S19	Line 2@19	14.784	0.456321	31.2383	0.0535	0.2171	0.0485	0.504821	17.5517	37.2629
									0.50-1.20	1 to 15	15	-0.417008	1 to 20	20	<1.36	14.38-15.21	14.807	0.217454	2	A5692	L3S9	Line 3@9	15.064	0.583194	31.1319	0.0519	0.1024	0.0155	0.598694	17.6536	37.4123
									0.50-1.20	1 to 16	16	-0.413841	21 to 32	12	1.36-2.22	14.15-14.84	14.5098	0.232883	3	A5692	L3S1	Line 3@1	15.0066	0.69597	31.2548	0.0339	0.0686		0.69597	17.4832	37.7495
									0.50-1.23	1 to 17	17	-0.366034							4	A5692	L5S2	Line 5@2	14.6024	0.598401	30.9055	0.0494	0.1026	0.1094	0.707801	17.5265	37.134
									0.50-1.25	1 to 18	18	-0.479226							5	A5692	L2S12	Line 2@12	15.0353	0.650571	31.1673	0.033	0.0849	0.0723	0.722871	17.3473	37.4931
									0.50-1.25	1 to 19	19	-0.368533							6	A5692	L2S11	Line 2@11	15.0159	0.645354	30.646	0.0496	0.0822	0.1618	0.807154	17.4375	37.0779
									0.50-1.28	1 to 20	20	-0.379312							7	A5692	L2S4	Line 2@4	15.0451	0.79143	31.0026	0.0579	0.0767	0.0468	0.83823	17.4139	37.7654
									0.50-1.36	1 to 21	21	-0.475787							8	A5692	L1S26	Line 1@26	15.2148	0.719613	30.7085	0.0493	0.1372	0.1433	0.862913	17.2268	37.2305
									0.50-1.43	1 to 22	22	-0.474851							9	A5692	L1S2	Line 1@2	14.5044	0.843933	30.9332	0.0444	0.1563	0.0545	0.898433	17.5207	37.6834
									0.50-1.44	1 to 23	23	-0.425377							10	A5692	L1S20	Line 1@20	14.7261	0.903318	30.8516	0.0509	0.0812	0.0221	0.925418	17.5247	37.0526
									0.50-1.46	1 to 24	24	-0.444057							11	A5692	L1S25	Line 1@25	14.684	0.736041	30.7939	0.0373	0.0974	0.1971	0.933141	17.5939	37.1619
									0.50-1.48	1 to 25	25	-0.407673							12	A5692	L2S16	Line 2@16	14.6112	0.959817	31.0389	0.0423	0.1164		0.959817	17.591	37.4834
									0.50-1.50	1 to 26	26	-0.486525							13	A5692	L4S7	Line 4@7	14.8292	0.843933	30.7415	0.0289	0.1176	0.1581	1.00203	17.5786	37.2994
									0.50-1.54	1 to 27	27	-0.520782							14	A5692	L1S34	Line 1@34	14.7353	0.692751	30.7822	0.0357	0.0741	0.3222	1.01495	17.4191	37.5266
									0.50-1.55	1 to 28	28	-0.565103							15	A5692	L1S27	Line 1@27	14.599	0.911088	30.6992	0.0395	0.1015	0.2872	1.19829	17.416	37.6033
									0.50-1.58	1 to 29	29	-0.53788							16	A5692	L4S30	Line 4@30	14.7477	0.94572	30.649	0.0384	0.1616	0.2534	1.19912	17.5885	37.3721
									0.50-1.58	1 to 30	30	-0.576811							17	A5692	L2S28	Line 2@28	14.8409	1.19569	30.867	0.0445		0.0365	1.23219	17.4981	37.9365
									0.50-1.73	1 to 31	31	-0.585275							18	A5692	L1S24	Line 1@24	14.382	0.803085	30.3822	0.031	0.0865	0.4427	1.24579	17.4108	37.0172
									0.50-2.22	1 to 32	32	-0.600142							19	A5692	L3S4	Line 3@4	14.9988	1.23088	30.8426	0.0437		0.0213	1.25218	17.3737	37.4922
																			20	A5692	L1S3	Line 1@3	14.7135	0.796203	30.5881	0.0384	0.0849	0.4817	1.2779	17.4524	37.5988
																			21	A5692	L1S9	Line 1@9	14.3558	1.12188	30.5896	0.034	0.0844	0.2389	1.36078	17.3279	37.2932
																			22	A5692	L1S13	Line 1@13	14.6793	1.02209	30.5712	0.047	0.097	0.4122	1.43429	17.5659	37.697
																			23	A5692	L1S28	Line 1@28	14.8371	0.908868	30.6033	0.0497	0.137	0.5334	1.44227	17.4533	37.7659
																			24	A5692	L4S6	Line 4@6	14.6302	1.08147	30.6445	0.0544	0.0917	0.3772	1.45867	17.5092	37.4946
																			25	A5692	L4S25	Line 4@25	14.8211	0.851481	30.6548	0.0456	0.1315	0.633	1.48448	17.3814	38.0149
																			26	A5692	L1S4	Line 1@4	14.1465	1.06649	30.4673	0.0475	0.0969	0.4287	1.49519	17.3811	37.5273
																			27	A5692	L2S22	Line 2@22	14.4592	1.16705	30.4122	0.0289	0.1076	0.3759	1.54295	17.4795	37.6391
																			28	A5692	L1S38	Line 1@38	14.2951	0.872793	30.6332	0.0973	0.0494	0.6771	1.54989	17.4921	37.941
																			29	A5692	L4S22	Line 4@22	14.7503	1.02131	30.4152	0.0578	0.1126	0.5547	1.57601	17.6158	37.5516
																			30	A5692	L2S17	Line 2@17	14.2379	1.16028	30.2782	0.0586	0.074	0.4158	1.57608	17.4578	37.076
																			31	A5692	L4S9	Line 4@9	14.5103	1.29426	30.4641	0.0464	0.0392	0.4397	1.73396	17.4746	37.5036
																			32	A5692	L4S8	Line 4@8	14.395	1.45399	30.0317	0.0431	0.1237	0.7704	2.22439	17.4002	37.3042
																						Min	14.1465	0.456321	30.0317	0.0289	<0.02	<0.01	0.504821	17.2268	37.0172
a: Green color highlights Pearson correlation coefficients that are over crytical values at significance level of 0.05 (i.e., statistically significant Pearson's r).																						Max	15.2148	1.45399	31.2548	0.0973	0.2171	0.7704	2.22439	17.6536	38.0149
b: Because of the relatively fine zoning LM-19 lawsonite visible in Fig. 4, we assigned SIMS and EPMA individual analyses if they are located within 30 μm or less from each other.
c: Data are sorted by Fe2O3+TiO2.
